# Supplementary material for: Complexation with pagoda[n]arene (n= 4, 5) protects ferrocenium from oxidation
Source: Royal Society of Chemistry journal article supplement (doi:10.1039/d3cc01202f), 2023-01-01
Supplement: d3cc01202f1.pdf [file d3cc01202f1.pdf]

## Electronic Supplementary Information

### Complexation with pagoda[n]arene (n=4, 5) protects ferrocenium from oxidation

Gui-Hua Chen,<sup>a</sup> Yi-Meng Duan,<sup>a</sup> Ying Li,<sup>a</sup> Xiao-Ni Han,<sup>b</sup> Kun-Peng Wang\*,<sup>a</sup> Zhi-  
Qiang Hu\*,<sup>a</sup> Chuan-Feng Chen\*<sup>b,c</sup>

<sup>a</sup> *Key Laboratory of Optic-electric Sensing and Analytical Chemistry for Life Science,  
MOE, College of Chemistry and Molecular Engineering, Qingdao University of  
Science and Technology, Qingdao, 266042, China*

<sup>b</sup> *Beijing National Laboratory for Molecular Sciences, CAS Key Laboratory of  
Molecular Recognition and Function, Institute of Chemistry, Chinese Academy of  
Sciences, Beijing 100190, China*

<sup>c</sup> *University of Chinese Academy of Sciences, Beijing 100049, China*

\* Corresponding author,

E-mail: wangkunpeng@qust.edu.cn, huzhiqiang@qust.edu.cn, cchen@iccas.ac.cn

## Table of Contents

|                                                                                                 |           |
|-------------------------------------------------------------------------------------------------|-----------|
| <b>1. Materials and methods.....</b>                                                            | <b>3</b>  |
| 1.1 General Methods.....                                                                        | 3         |
| 1.2 FL Spectroscopy.....                                                                        | 3         |
| 1.3 Cyclic voltammetry.....                                                                     | 3         |
| 1.4 Data Analysis and Fitting.....                                                              | 4         |
| 1.5 DFT calculations.....                                                                       | 5         |
| <b>2. <sup>1</sup>H NMR spectrum of P5 and P4.....</b>                                          | <b>5</b>  |
| <b>3. UV-vis spectra.....</b>                                                                   | <b>6</b>  |
| 3.1 UV-vis spectra of Fc <sup>+</sup> .....                                                     | 6         |
| 3.2 UV-vis spectra of Fc <sup>+</sup> with P5.....                                              | 7         |
| 3.3 UV-vis spectra of Fc <sup>+</sup> with P4.....                                              | 7         |
| 3.4 UV-vis spectra of host-guest complexes.....                                                 | 8         |
| <b>4. <sup>1</sup>H NMR study about the complexation of Fc with P4 and P5 respectively.....</b> | <b>8</b>  |
| <b>5. <sup>1</sup>H NMR study about the complexation of Fc with P4 and P5 respectively.....</b> | <b>9</b>  |
| <b>6. The fluorescence titration experiments of P5 and P4 with Fc respectively.....</b>         | <b>9</b>  |
| 6.1 P5 and P4 with Fc.....                                                                      | 10        |
| 6.2 P5 and P4 with Cob <sup>+</sup> .....                                                       | 11        |
| <b>7. Job' plot of P5 and P4 with Fc<sup>+</sup> and Cob<sup>+</sup> respectively.....</b>      | <b>11</b> |
| <b>8. ESI-MS of host-guest complexes.....</b>                                                   | <b>12</b> |
| <b>9. Stability test of Fc<sup>+</sup>.....</b>                                                 | <b>13</b> |
| <b>10. AIM Analysis of the Complexes.....</b>                                                   | <b>14</b> |
| <b>11. Comparison of complexation properties.....</b>                                           | <b>22</b> |
| <b>12. The atomic coordinates of optimized structures.....</b>                                  | <b>26</b> |
| <b>13. References.....</b>                                                                      | <b>57</b> |

## 1. Materials and methods

### 1.1 General Methods

All reagents involved in this research were commercially available and used without further purification unless noted otherwise. Solvents were either employed as purchased or dried before use by standard laboratory procedures. Ferrocene (**Fc**), ferrocenium hexafluorophosphate (**Fc<sup>+</sup>**), and bis(cyclopentadienyl)Cobalt(III) hexafluorophosphate were purchased from Sigma Aldrich. The electrolyte *n*-Bu<sub>4</sub>NPF<sub>6</sub> (TCI Chemicals) was dried in vacuo before its use in electrochemical experiments. Pagoda[4]arene and Pagoda[5]arene were synthesized according to the existing method.<sup>1,2</sup>

<sup>1</sup>H NMR spectra were measured by Bruker DMX 500 spectrometer. All chemical shifts are reported in ppm with residual solvents or TMS (tetramethylsilane) as the internal standards. Electrospray ionization mass spectra (ESI-MS) were recorded on the Matrix Assisted Laser Desorption/Ionization, Time of Flight, MALDI-TOF.

### 1.2 FL Spectroscopy

The Fluorescence spectra were recorded on RF-6000 SHIMADZU. **Fc<sup>+</sup>** is unstable in organic solvents, so all solvents are purged with argon to remove the dissolved oxygen.

### 1.3 Cyclic voltammetry<sup>3</sup>

Cyclic voltammetry was performed on a CS Electrochemical Workstation model CS150M. A three-electrode configuration in a single-compartment cell (5 mL) was used including a freshly polished glassy carbon working electrode, a platinum-wire

counter-electrode and a silver-wire pseudoreference electrode. All solutions were argon-purged beforehand during the measurements. The cyclic voltammetry analysis was carried out in a mixed solution of chloroform and acetonitrile ( $\text{CHCl}_3/\text{CH}_3\text{CN} = 4/1$ , v/v) containing 0.1 M *n*-Bu<sub>4</sub>NPF<sub>6</sub> (Tetrabutylammonium hexafluorophosphate).

#### 1.4 Data Analysis and Fitting<sup>4</sup>

All fittings were performed in a nonlinear manner, the complexation process of the Pagoda[n]arenes (*H*) with the guest (*G*) was expressed by the following equation according to a 1:1 host-guest binding stoichiometry.

$$[G] + [HG] = [G]_0$$

$$K_a = \frac{[HG]}{[H][G]}$$

$$[HG] = \frac{K_a[H][G]_0}{1 + K_a[H]}$$

$$[H] = \frac{(K_a[H]_0 - K_a[G]_0 - 1) + \sqrt{(K_a[G]_0 - K_a[H]_0 + 1)^2 + 4K_a[H]_0}}{2K_a}$$

$$F = F_{HG} + (F_H - F_{HG}) \frac{[H]}{[H]_0}$$

$$= F_{HG}$$

$$+ (F_H - F_{HG}) \frac{([H]_0 - [G]_0 - 1/K_a) + \sqrt{([H]_0 + [G]_0 + 1/K_a)^2 - 4[H]_0[G]_0}}{2[H]_0}$$

$K_a$  is the binding constant for the complexation process, and it can be obtained by analyzing the sequential changes of fluorescence intensity of Pagoda[n]arenes at various concentrations of guest. Here,  $[G]_0$  is the initial concentration of guest and constant,  $[H]_0$  is the initial concentration of Pagoda[n]arenes and constant,  $[HG]$  is the

concentrations of the complex formed by the host and guest.  $[H]$  is the concentration of the host,  $[G]$  is the concentrations of the guest.  $F$  is the fluorescence intensity of the whole system after adding the guest to the pagoda[n]arenes.  $F_{HG}$  is the fluorescence intensity of the complex formed by the host and guest.  $F_H$  is the fluorescence intensity of the pagoda[n]arenes.

### 1.5 DFT calculations

Calculations were performed using M06-2X/GEN functional combined with 6-31G(d) and LAN2DZ basis sets (Fe, Co, LAN2DZ, others, 6-31G(d)) in Gaussian 09. All the structures were optimized and certified without imaginary frequencies. In demand of considering basis set superposition error (BSSE, using key word “counterpoise=2”) towards complex interaction.

## 2. $^1\text{H}$ NMR spectrum of P5 and P4

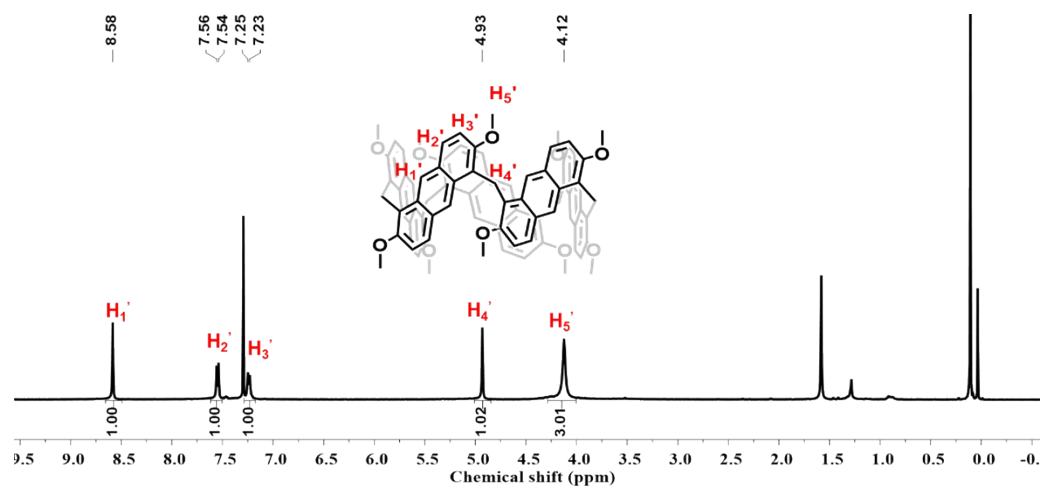

**Fig. S1**  $^1\text{H}$  NMR spectrum (500 MHz,  $\text{CDCl}_3$ , 298K) of P5.

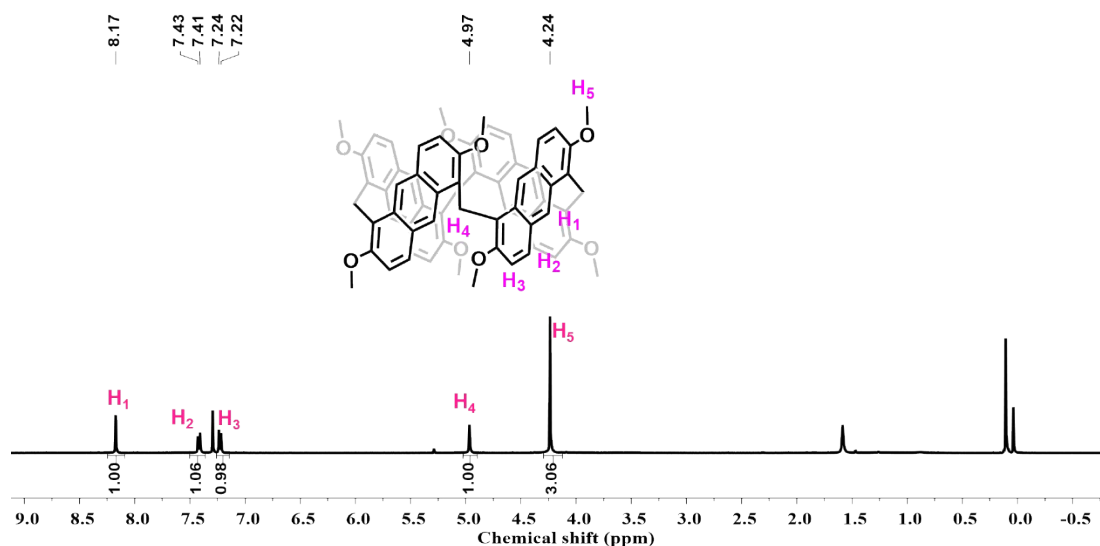

**Fig. S2**  $^1\text{H}$  NMR spectrum (500 MHz,  $\text{CDCl}_3$ , 298K) of **P4**.

### 3. UV-vis spectra

#### 3.1. UV-vis spectra of $\text{Fc}^+$

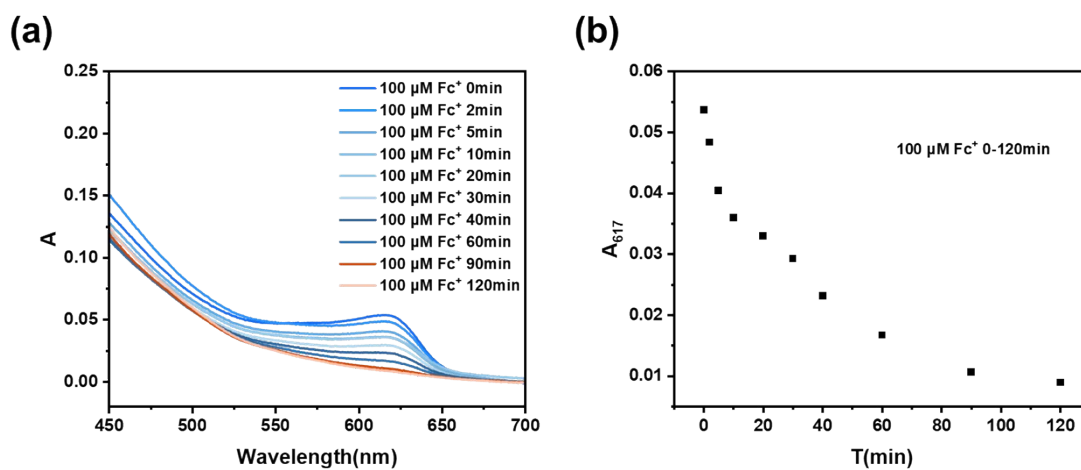

**Fig. S3** The UV-vis spectra of (a)  $\text{Fc}^+$  with time (0-120 min). (b) Plot of absorption of  $\text{Fc}^+$  at 617 nm versus time.  $\text{CHCl}_3/\text{CH}_3\text{CN}$  (4/1, v/v).

### 3.2. UV-vis spectra of $\text{Fc}^+$ with P5

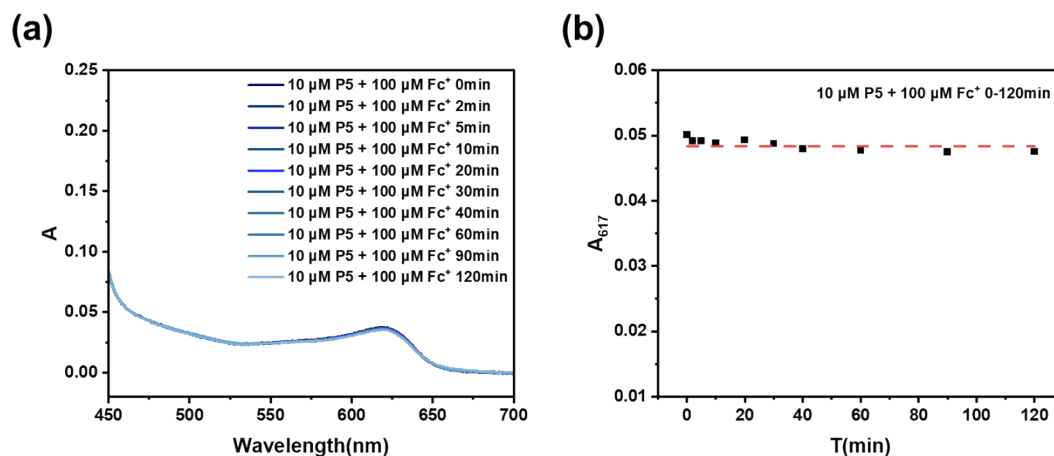

**Fig. S4** The UV-vis spectra of (a)  $\text{Fc}^+$ @P5 with time (0-120min). (b) Plot of absorption of  $\text{Fc}^+$ @P5 at 617 nm versus time.  $\text{CHCl}_3/\text{CH}_3\text{CN}$  (4/1, v/v).

### 3.3. UV-vis spectra of $\text{Fc}^+$ with P4

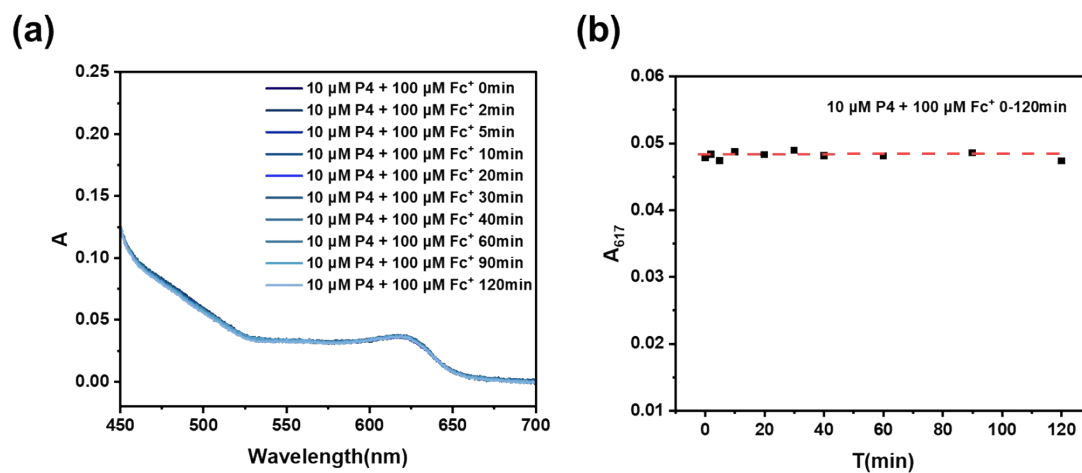

**Fig. S5** The UV-vis spectra of (a)  $\text{Fc}^+$ @P4 with time (0-120min). (b) Plot of absorption of  $\text{Fc}^+$ @P4 at 617 nm versus time.  $\text{CHCl}_3/\text{CH}_3\text{CN}$  (4/1, v/v).

### 3.4. UV-vis spectra of host-guest complexes

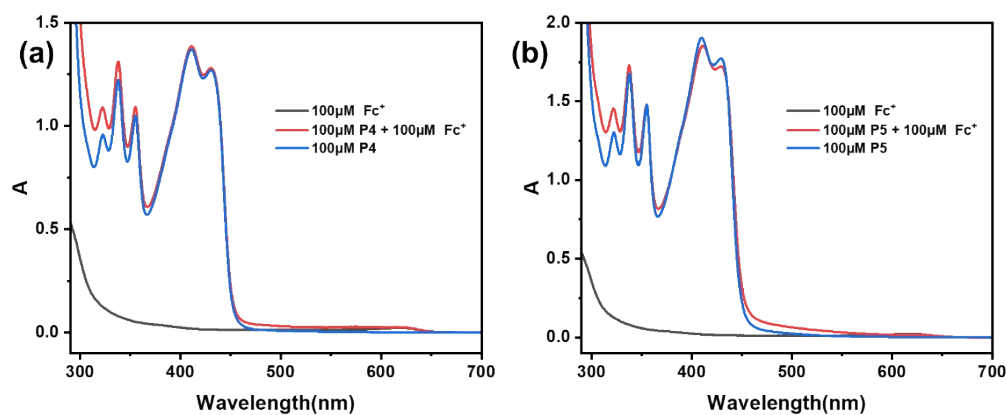

**Fig. S6** The UV-vis spectra of (a) P4, Fc<sup>+</sup> and Fc<sup>+</sup>@P4, (b) P4, Fc<sup>+</sup> and Fc<sup>+</sup>@P4.

Solvent: CHCl<sub>3</sub>/CH<sub>3</sub>CN (4/1, v/v).

### 4. <sup>1</sup>H NMR study about the complexation of Fc with P4 and P5 respectively

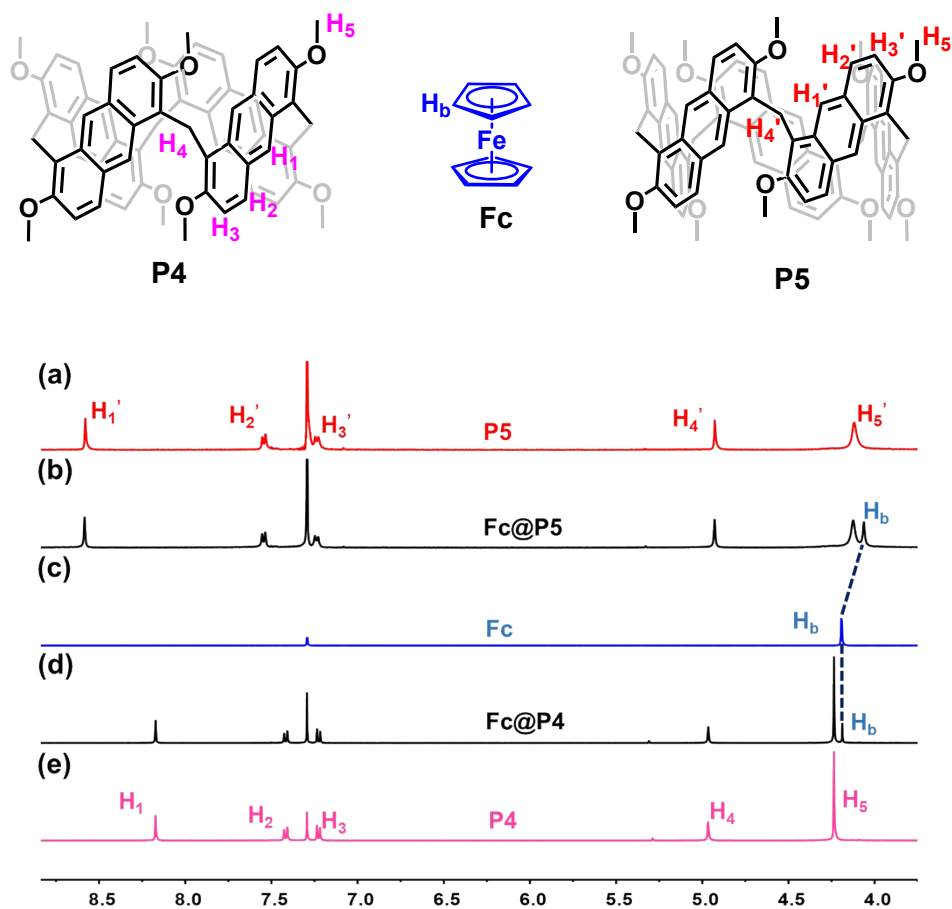

**Fig. S7** Partial <sup>1</sup>H NMR spectrum (CDCl<sub>3</sub>, 298K) of (a) P5 (1 mM), (b) Fc (1 mM)



+P5 (1 mM), (c) Fc (1 mM), (d) Fc (1 mM) +P4 (1 mM), (e) P4 (1 mM).

### 5. $^1\text{H}$ NMR study about the complexation of $\text{Cob}^+$ with P5

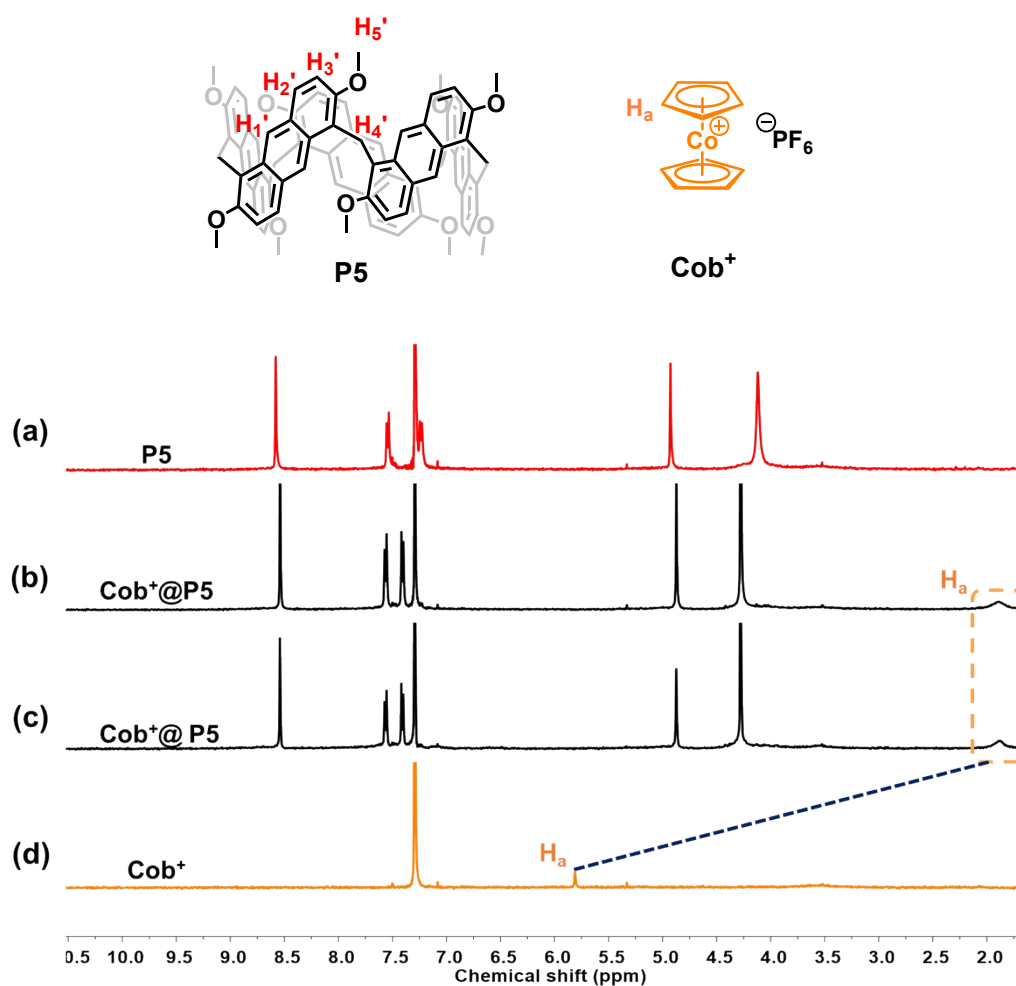

**Fig. S8** Partial  $^1\text{H}$  NMR spectrum (CDCl<sub>3</sub>, 298K) of (a) P5 (1 mM), (b)  $\text{Cob}^+$  (1 mM) +P5 (1 mM), (c)  $\text{Cob}^+$  (1 mM) + P5 (2 mM), (d)  $\text{Cob}^+$  (1 mM).

### 6. The fluorescence titration experiments of P5 and P4 with Fc respectively.

Excitation at 330 nm, the fluorescent titration experiments were performed with a constant concentration of P5 and P4 ( $1 \times 10^{-6}$  M) and varying concentrations of Fc in CHCl<sub>3</sub>/CH<sub>3</sub>CN (4/1, v/v). The binding constants are determined by measuring the emission intensities of P5 and P4.

## 6.1. P5 and P4 with Fc

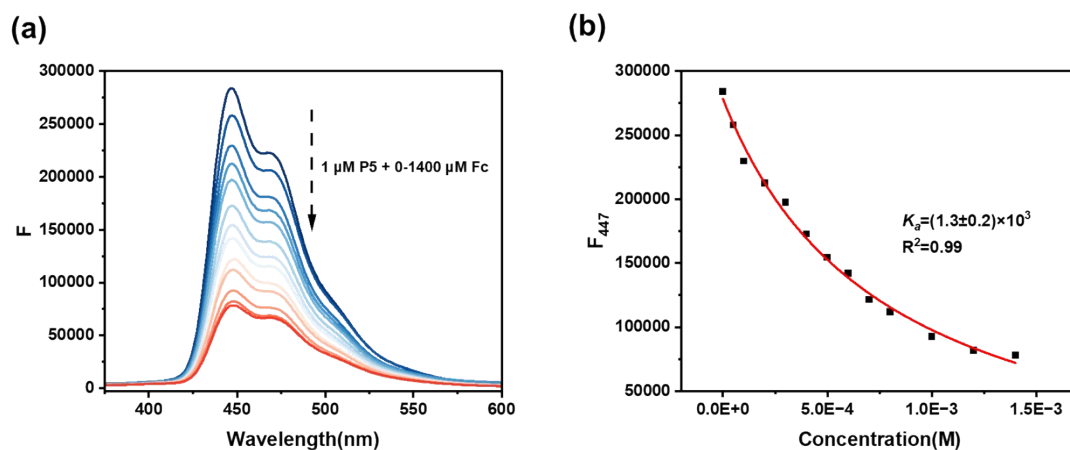

**Fig. S9** (a) Fluorescent titrations of **P5** (1.0 × 10<sup>-6</sup> M) with various equivalence of **Fc** (CHCl<sub>3</sub>/CH<sub>3</sub>CN=4/1, v/v) (λ<sub>ex</sub>=330 nm). (b) Curve fit of the titration data of **P5** (1.0 × 10<sup>-6</sup> M) when titrated with **Fc**.

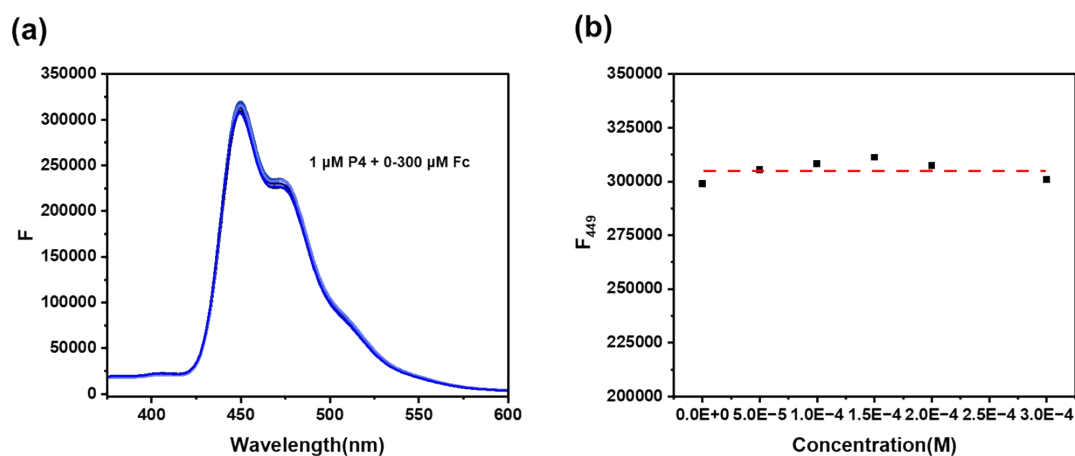

**Fig. S10** (a) Fluorescent titrations of **P4** (1.0 × 10<sup>-6</sup> M) with various equivalence of **Fc** (CHCl<sub>3</sub>/CH<sub>3</sub>CN=4/1, v/v) (λ<sub>ex</sub>=330 nm). (b) Curve fit of the titration data of **P4** (1.0 × 10<sup>-6</sup> M) when titrated with **Fc**.

6.2. P5 and P4 with Cob<sup>+</sup>

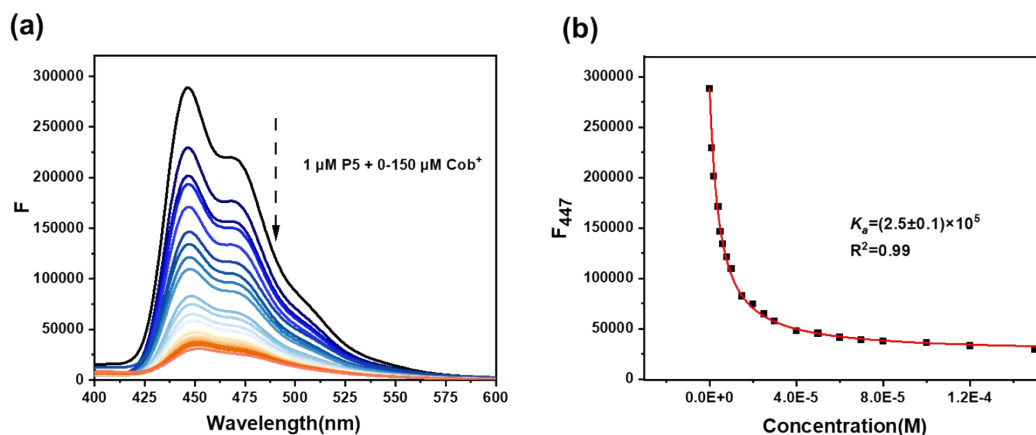

**Fig. S11** (a) Fluorescent titrations of **P5** ( $1.0 \times 10^{-6}$  M) with various equivalence of **Cob<sup>+</sup>** ( $\text{CHCl}_3/\text{CH}_3\text{CN}=4/1$ , v/v) ( $\lambda_{\text{ex}}=330$  nm). (b) Curve fit of the titration data of **P5** ( $1.0 \times 10^{-6}$  M) when titrated with **Cob<sup>+</sup>**.

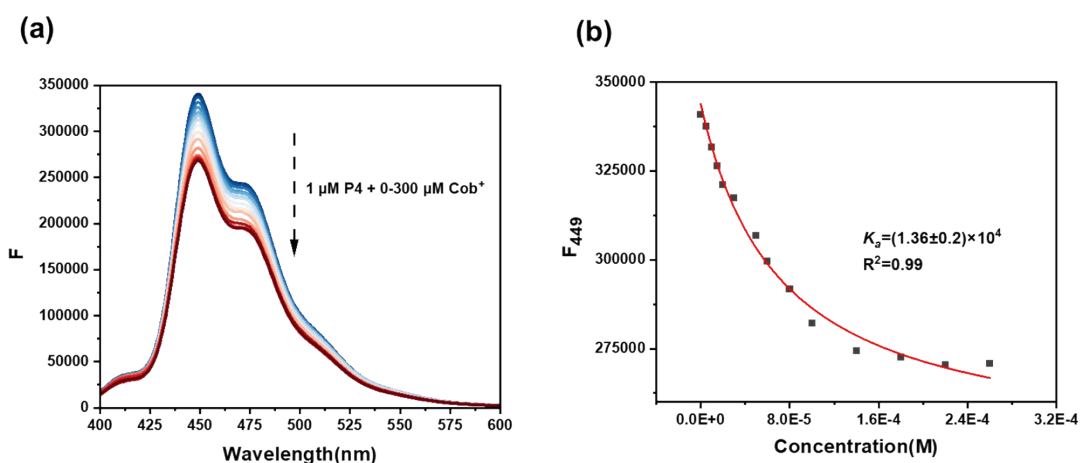

**Fig. S12** (a) Fluorescent titrations of **P4** ( $1.0 \times 10^{-6}$  M) with various equivalence of **Cob<sup>+</sup>** ( $\text{CHCl}_3/\text{CH}_3\text{CN}=4/1$ , v/v) ( $\lambda_{\text{ex}}=330$  nm). (b) Curve fit of the titration data of **P4** ( $1.0 \times 10^{-6}$  M) when titrated with **Cob<sup>+</sup>**.

## 7. Job' plot of P5 and P4 with $\text{Fc}^+$ and $\text{Cob}^+$ respectively

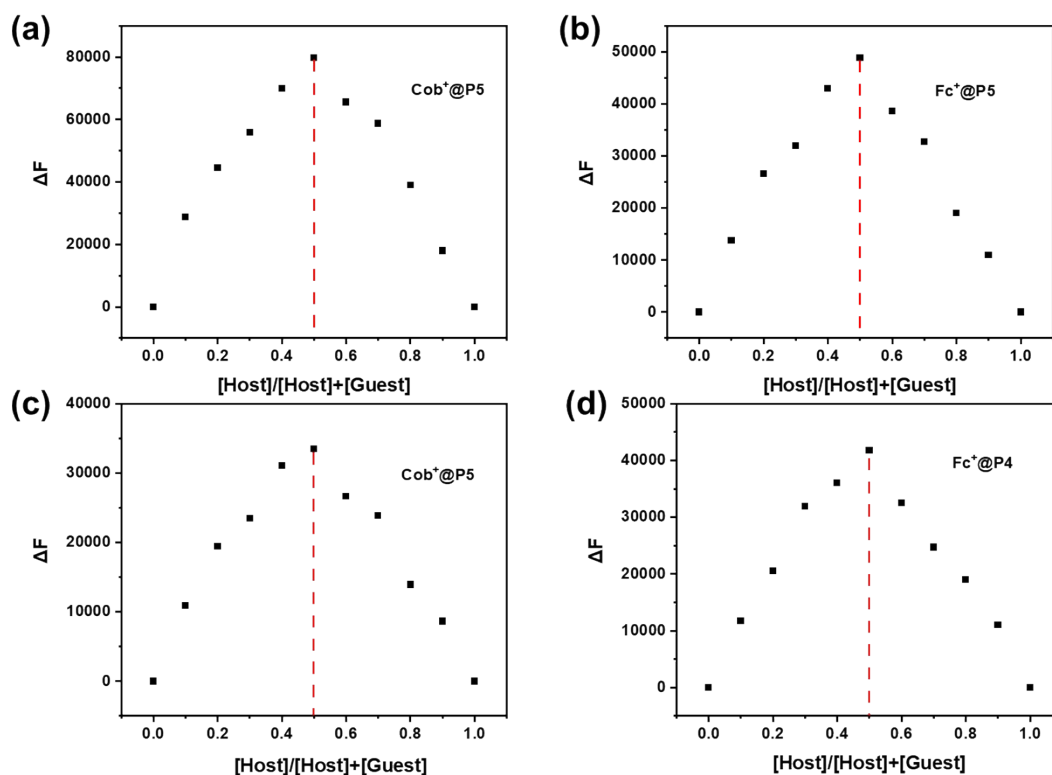

**Fig. S13** Job' plot of (a)  $\text{Cob}^+$ @P5, (b)  $\text{Fc}^+$ @P5, (c)  $\text{Cob}^+$ @P4 and (d)  $\text{Fc}^+$ @P4, the total concentration of the host and the guest is fixed:  $[\text{Host}]+[\text{Guest}] = 1.0$  mmol/L.

## 8. HR-ESI-MS of host-guest complexes

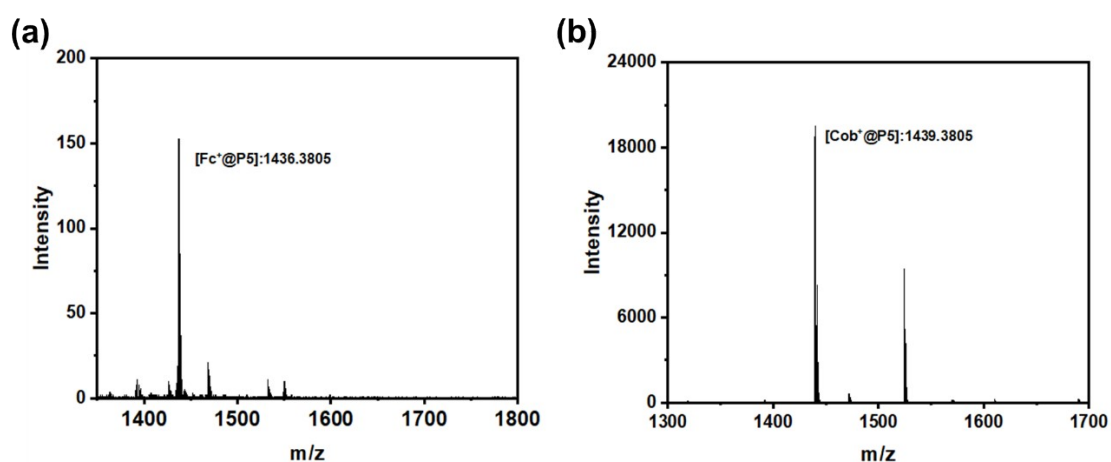

**Fig. S14** HR-ESI-MS spectra of an equimolar mixture of (a)  $\text{Fc}^+$ @P5, (b)  $\text{Cob}^+$ @P5.

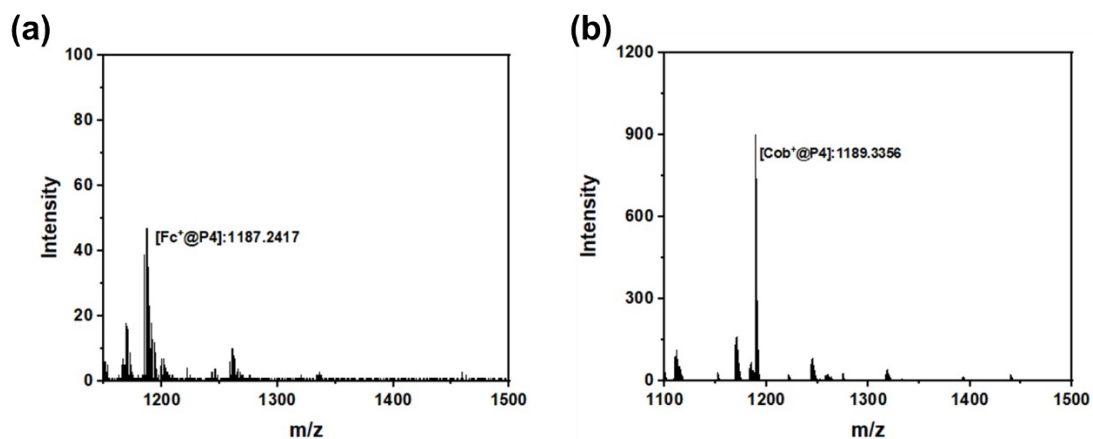

Fig. S15 HR-ESI-MS spectra of an equimolar mixture of (a)  $\text{Fc}^+\text{@P4}$ , (b)  $\text{Cob}^+\text{@P4}$ .

### 9. Stability test of $\text{Fc}^+$

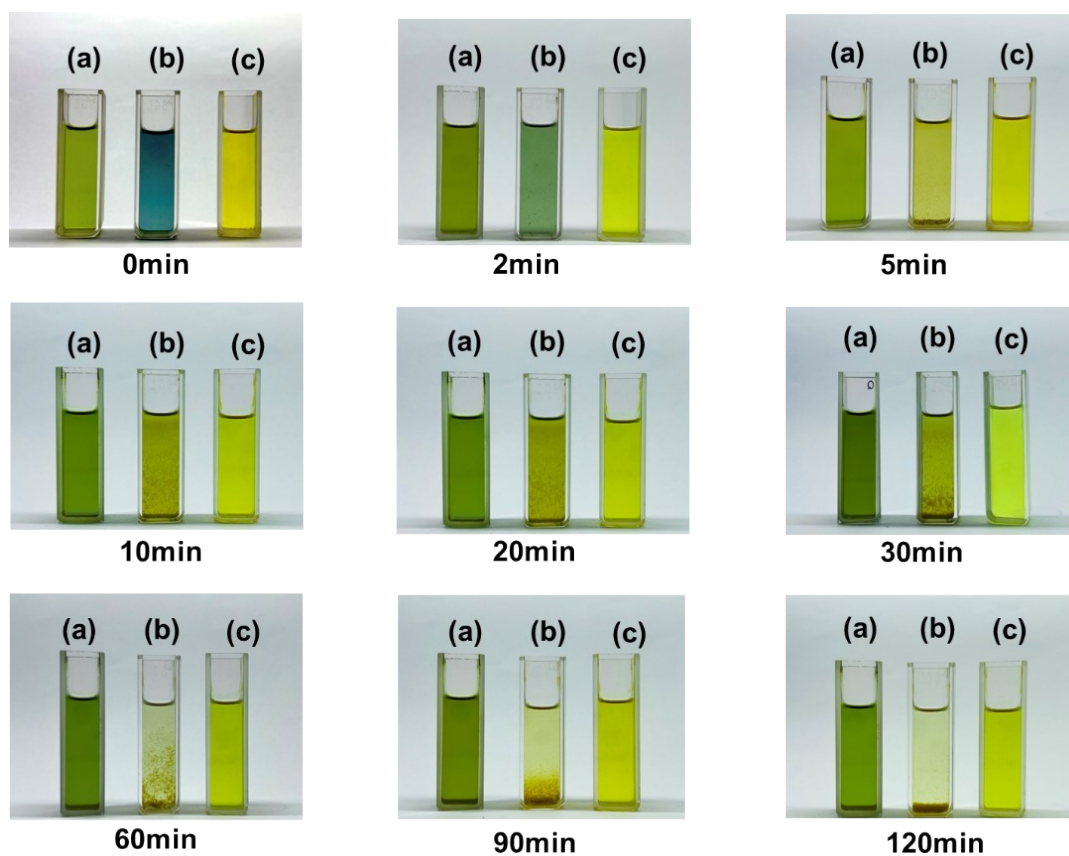

Fig. S16 Stability test in  $\text{CHCl}_3/\text{CH}_3\text{CN}$  (4/1, v/v) (a)  $\text{P4}$  (1 mM) and  $\text{Fc}^+$  (1 mM). (b)  $\text{Fc}^+$  (1 mM). (c)  $\text{P4}$  (1 mM).

## 10. AIM Analysis of the Complexes

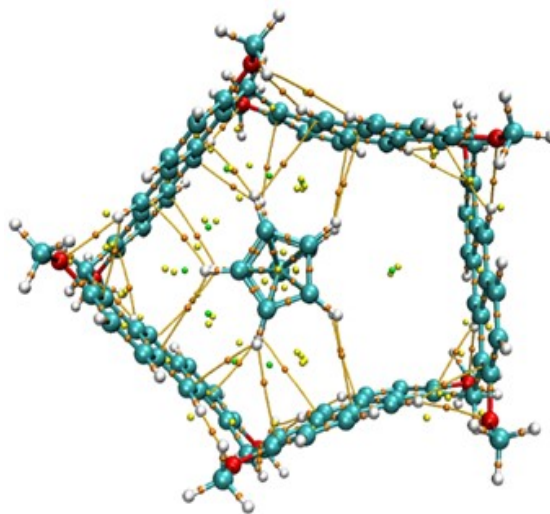

**Fig. S17** AIM analysis of [Cob<sup>+</sup>@P5]-I.

**Table S1.** The computed electron density values ( $\rho$ ), the corresponding Laplacian values ( $\nabla^2\rho$ ), and the eigenvalues ( $\lambda_1 < \lambda_2 < \lambda_3, \nabla^2\rho = \lambda_1 + \lambda_2 + \lambda_3$ ) for selected bond critical points of [Cob<sup>+</sup>@P5]-I.

| Interaction         | $\rho$ | $\nabla^2\rho$ | $\lambda_1$ | $\lambda_2$ | $\lambda_3$ |
|---------------------|--------|----------------|-------------|-------------|-------------|
| C-H $\cdots\pi$ (1) | 0.0052 | 0.0152         | -0.0034     | -0.0022     | 0.0208      |
| C-H $\cdots\pi$ (2) | 0.0027 | 0.0087         | -0.0015     | -0.0003     | 0.0105      |
| C-H $\cdots\pi$ (3) | 0.0044 | 0.0145         | -0.0031     | -0.0019     | 0.0195      |
| C-H $\cdots\pi$ (4) | 0.0043 | 0.0142         | -0.0028     | -0.0020     | 0.0191      |
| C-H $\cdots\pi$ (5) | 0.0044 | 0.0145         | -0.0031     | -0.0019     | 0.0195      |
| C-H $\cdots\pi$ (6) | 0.0043 | 0.0142         | -0.0028     | -0.0020     | 0.0190      |
| C-H $\cdots\pi$ (7) | 0.0027 | 0.0087         | -0.0015     | -0.0003     | 0.0105      |
| C-H $\cdots\pi$ (8) | 0.0052 | 0.0152         | -0.0034     | -0.0022     | 0.0208      |
| C-H $\cdots\pi$ (9) | 0.0067 | 0.0228         | -0.0048     | -0.0004     | 0.0280      |

|                      |        |        |         |         |        |
|----------------------|--------|--------|---------|---------|--------|
| C-H $\cdots\pi$ (10) | 0.0071 | 0.0227 | -0.0053 | -0.0046 | 0.0326 |
| C-H $\cdots\pi$ (11) | 0.0043 | 0.0147 | -0.0023 | -0.0017 | 0.0187 |
| C-H $\cdots\pi$ (12) | 0.0040 | 0.0122 | -0.0027 | -0.0014 | 0.0163 |
| C-H $\cdots\pi$ (13) | 0.0043 | 0.0147 | -0.0023 | -0.0017 | 0.0186 |
| C-H $\cdots\pi$ (14) | 0.0040 | 0.0122 | -0.0027 | -0.0014 | 0.0163 |
| C-H $\cdots\pi$ (15) | 0.0071 | 0.0227 | -0.0053 | -0.0046 | 0.0326 |
| C-H $\cdots\pi$ (16) | 0.0067 | 0.0228 | -0.0048 | -0.0004 | 0.0280 |

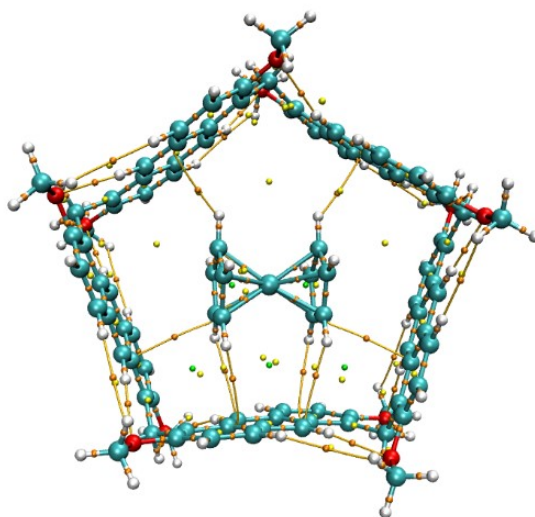

**Fig. S18** AIM analysis of [Cob<sup>+</sup>@P5]-II.

**Table S2.** The computed electron density values ( $\rho$ ), the corresponding Laplacian values ( $\nabla^2\rho$ ), and the eigenvalues ( $\lambda_1 < \lambda_2 < \lambda_3, \nabla^2\rho = \lambda_1 + \lambda_2 + \lambda_3$ ) for selected bond critical points of [Cob<sup>+</sup>@P5]- II.

| Interaction         | $\rho$ | $\nabla^2\rho$ | $\lambda_1$ | $\lambda_2$ | $\lambda_3$ |
|---------------------|--------|----------------|-------------|-------------|-------------|
| C-H $\cdots\pi$ (1) | 0.0053 | 0.0186         | -0.0036     | -0.0008     | 0.0230      |
| C-H $\cdots\pi$ (2) | 0.0051 | 0.0158         | -0.0034     | -0.0029     | 0.0221      |
| C-H $\cdots\pi$ (3) | 0.0051 | 0.0157         | -0.0033     | -0.0029     | 0.0220      |

|                     |        |        |         |          |        |
|---------------------|--------|--------|---------|----------|--------|
| C-H $\cdots\pi$ (4) | 0.0053 | 0.0186 | -0.0036 | -0.0008  | 0.0230 |
| C-H $\cdots\pi$ (5) | 0.0063 | 0.0223 | -0.0046 | -0.0010  | 0.0279 |
| C-H $\cdots\pi$ (6) | 0.0063 | 0.0223 | -0.0046 | -0.0010  | 0.0278 |
| $\pi\cdots\pi$ (1)  | 0.0070 | 0.0224 | -0.0030 | -0.00023 | 0.0277 |
| $\pi\cdots\pi$ (2)  | 0.0070 | 0.0224 | -0.0030 | -0.0023  | 0.0277 |

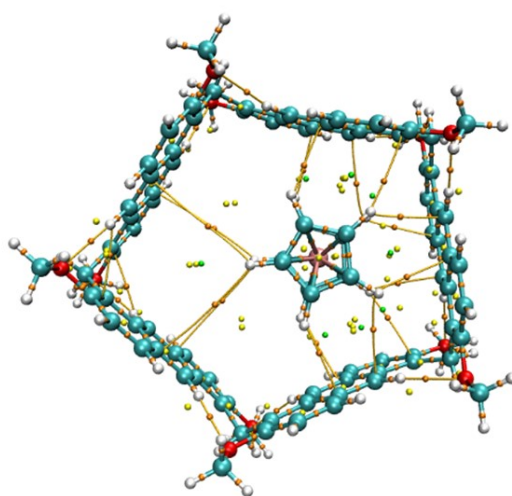

**Fig. S19** AIM analysis of [Fc<sup>+</sup>@P5]-I.

**Table S3.** The computed electron density values ( $\rho$ ), the corresponding Laplacian values ( $\nabla^2\rho$ ), and the eigenvalues ( $\lambda_1 < \lambda_2 < \lambda_3$ ,  $\nabla^2\rho = \lambda_1 + \lambda_2 + \lambda_3$ ) for selected bond critical points of [Fc<sup>+</sup>@P5]-I.

| Interaction         | $\rho$ | $\nabla^2\rho$ | $\lambda_1$ | $\lambda_2$ | $\lambda_3$ |
|---------------------|--------|----------------|-------------|-------------|-------------|
| C-H $\cdots\pi$ (1) | 0.0001 | 0.0007         | -0.0001     | 0.0000      | 0.0009      |
| C-H $\cdots\pi$ (2) | 0.0002 | 0.0008         | -0.0001     | -0.0001     | 0.0010      |
| C-H $\cdots\pi$ (3) | 0.0003 | 0.0011         | -0.0001     | -0.0001     | 0.0014      |
| C-H $\cdots\pi$ (4) | 0.0002 | 0.0009         | -0.0001     | -0.0001     | 0.0011      |
| C-H $\cdots\pi$ (5) | 0.0077 | 0.0265         | -0.0055     | -0.0047     | 0.0368      |



|                      |        |        |         |         |        |
|----------------------|--------|--------|---------|---------|--------|
| C-H $\cdots\pi$ (6)  | 0.0070 | 0.0227 | -0.0053 | -0.0022 | 0.0302 |
| C-H $\cdots\pi$ (7)  | 0.0036 | 0.0112 | -0.0021 | -0.0013 | 0.0146 |
| C-H $\cdots\pi$ (8)  | 0.0051 | 0.0155 | -0.0030 | -0.0017 | 0.0203 |
| C-H $\cdots\pi$ (9)  | 0.0070 | 0.0224 | -0.0052 | -0.0040 | 0.0315 |
| C-H $\cdots\pi$ (10) | 0.0071 | 0.0259 | -0.0043 | -0.0019 | 0.0321 |
| C-H $\cdots\pi$ (11) | 0.0075 | 0.0279 | -0.0047 | -0.0018 | 0.0343 |
| C-H $\cdots\pi$ (12) | 0.0073 | 0.0235 | -0.0055 | -0.0043 | 0.0333 |
| C-H $\cdots\pi$ (13) | 0.0055 | 0.0164 | -0.0034 | -0.0020 | 0.0218 |
| C-H $\cdots\pi$ (14) | 0.0033 | 0.0105 | -0.0019 | -0.0009 | 0.0133 |
| C-H $\cdots\pi$ (15) | 0.0075 | 0.0256 | -0.0056 | -0.0044 | 0.0356 |
| C-H $\cdots\pi$ (16) | 0.0356 | 0.0233 | -0.0055 | -0.0027 | 0.0315 |

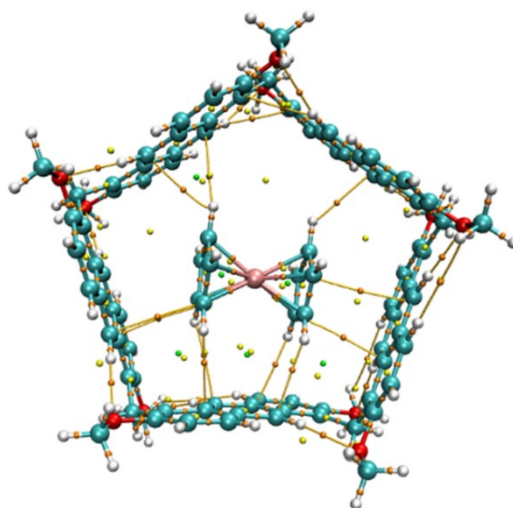

**Fig. S20** AIM analysis of [Fc<sup>+</sup>@P5]-II.

**Table S4.** The computed electron density values ( $\rho$ ), the corresponding Laplacian values ( $\nabla^2\rho$ ), and the eigenvalues ( $\lambda_1 < \lambda_2 < \lambda_3$ ,  $\nabla^2\rho = \lambda_1 + \lambda_2 + \lambda_3$ ) for selected bond critical points of [Fc<sup>+</sup>@P5]-II.

| Interaction         | $\rho$ | $\nabla^2\rho$ | $\lambda_1$ | $\lambda_2$ | $\lambda_3$ |
|---------------------|--------|----------------|-------------|-------------|-------------|
| C-H $\cdots\pi$ (1) | 0.0061 | 0.0212         | -0.0033     | -0.0009     | 0.0254      |
| C-H $\cdots\pi$ (2) | 0.0051 | 0.0179         | -0.0028     | -0.0001     | 0.0208      |
| C-H $\cdots\pi$ (3) | 0.0050 | 0.0171         | -0.0031     | -0.0019     | 0.0221      |
| C-H $\cdots\pi$ (4) | 0.0040 | 0.0123         | -0.0024     | -0.0020     | 0.0167      |
| C-H $\cdots\pi$ (5) | 0.0063 | 0.0227         | -0.0041     | -0.0010     | 0.0278      |
| C-H $\cdots\pi$ (6) | 0.0064 | 0.0201         | -0.0047     | -0.0036     | 0.0284      |
| C-H $\cdots\pi$ (7) | 0.0068 | 0.0226         | -0.0053     | -0.0025     | 0.0304      |
| $\pi\cdots\pi$ (1)  | 0.0066 | 0.0186         | -0.0035     | -0.0012     | 0.0233      |
| $\pi\cdots\pi$ (2)  | 0.0081 | 0.0268         | -0.0033     | -0.0020     | 0.0322      |
| $\pi\cdots\pi$ (3)  | 0.0084 | 0.0269         | -0.0045     | -0.0024     | 0.0338      |
| $\pi\cdots\pi$ (4)  | 0.0054 | 0.0151         | -0.0027     | -0.0008     | -0.0008     |

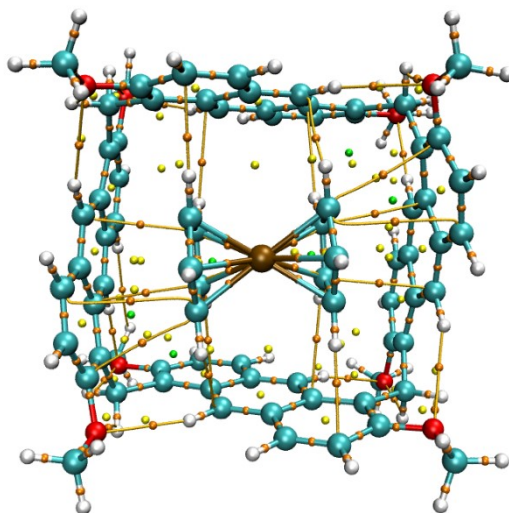

**Fig. S21** AIM analysis of  $\text{Cob}^+\text{@P4}$ .

**Table S5.** The computed electron density values ( $\rho$ ), the corresponding Laplacian values ( $\nabla^2\rho$ ), and the eigenvalues ( $\lambda_1 < \lambda_2 < \lambda_3$ ,  $\nabla^2\rho = \lambda_1 + \lambda_2 + \lambda_3$ ) for selected

bond critical points of **Cob<sup>+</sup>@P4**.

| Interaction         | $\rho$ | $\nabla^2\rho$ | $\lambda_1$ | $\lambda_2$ | $\lambda_3$ |
|---------------------|--------|----------------|-------------|-------------|-------------|
| C-H $\cdots\pi$ (1) | 0.0077 | 0.0259         | -0.0056     | -0.0032     | 0.0347      |
| C-H $\cdots\pi$ (2) | 0.0128 | 0.0426         | -0.0120     | -0.0059     | 0.0605      |
| C-H $\cdots\pi$ (3) | 0.0093 | 0.0315         | -0.0077     | -0.0041     | 0.0433      |
| C-H $\cdots\pi$ (4) | 0.0085 | 0.0310         | -0.0059     | -0.0040     | 0.0409      |
| C-H $\cdots\pi$ (5) | 0.0128 | 0.0426         | -0.0120     | -0.0059     | 0.0605      |
| C-H $\cdots\pi$ (6) | 0.0077 | 0.0259         | -0.0056     | -0.0032     | 0.0348      |
| C-H $\cdots\pi$ (7) | 0.0085 | 0.0310         | -0.0059     | -0.0040     | 0.0409      |
| C-H $\cdots\pi$ (8) | 0.0093 | 0.0315         | -0.0077     | -0.0041     | 0.0433      |
| $\pi\cdots\pi$ (1)  | 0.0120 | 0.0384         | -0.0067     | -0.0047     | 0.0498      |
| $\pi\cdots\pi$ (2)  | 0.0111 | 0.0370         | -0.0063     | -0.0033     | 0.0466      |
| $\pi\cdots\pi$ (3)  | 0.0079 | 0.0237         | -0.0033     | -0.0048     | 0.0274      |
| $\pi\cdots\pi$ (4)  | 0.0074 | 0.0232         | -0.0036     | -0.0008     | 0.0276      |
| $\pi\cdots\pi$ (5)  | 0.0074 | 0.0232         | -0.0036     | -0.0008     | 0.0276      |
| $\pi\cdots\pi$ (6)  | 0.0111 | 0.0370         | -0.0063     | -0.0033     | 0.0466      |
| $\pi\cdots\pi$ (7)  | 0.0079 | 0.0237         | -0.0033     | -0.0005     | 0.0274      |
| $\pi\cdots\pi$ (8)  | 0.0120 | 0.0383         | -0.0067     | -0.0047     | 0.0498      |

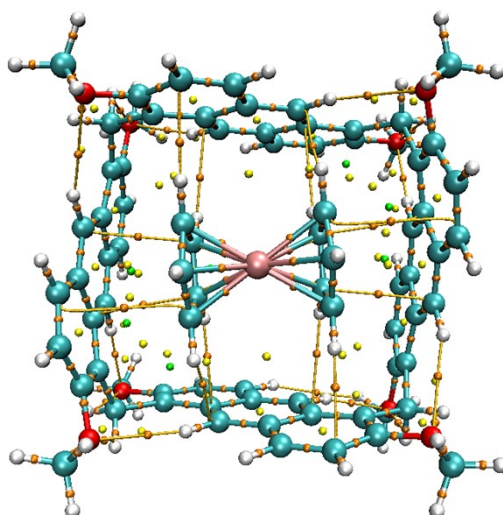

**Fig. S22** AIM analysis of **Fc<sup>+</sup>@P4**.

**Table S6.** The computed electron density values ( $\rho$ ), the corresponding Laplacian values ( $\nabla^2\rho$ ), and the eigenvalues ( $\lambda_1 < \lambda_2 < \lambda_3$ ,  $\nabla^2\rho = \lambda_1 + \lambda_2 + \lambda_3$ ) for selected bond critical points of **Fc<sup>+</sup>@P4**.

| Interaction         | $\rho$ | $\nabla^2\rho$ | $\lambda_1$ | $\lambda_2$ | $\lambda_3$ |
|---------------------|--------|----------------|-------------|-------------|-------------|
| C-H $\cdots\pi$ (1) | 0.0093 | 0.0314         | -0.0078     | -0.0034     | 0.0426      |
| C-H $\cdots\pi$ (2) | 0.0082 | 0.0298         | -0.0055     | -0.0035     | 0.0388      |
| C-H $\cdots\pi$ (3) | 0.0077 | 0.0262         | -0.0056     | -0.0036     | 0.0353      |
| C-H $\cdots\pi$ (4) | 0.0128 | 0.0425         | -0.0120     | -0.0058     | 0.0603      |
| C-H $\cdots\pi$ (5) | 0.0082 | 0.0298         | -0.0055     | -0.0035     | 0.0389      |
| C-H $\cdots\pi$ (6) | 0.0093 | 0.0314         | -0.0078     | -0.0034     | 0.0427      |
| C-H $\cdots\pi$ (7) | 0.0077 | 0.0262         | -0.0056     | -0.0036     | 0.0354      |
| C-H $\cdots\pi$ (8) | 0.0128 | 0.0426         | -0.0120     | -0.0058     | 0.0603      |
| $\pi\cdots\pi$ (1)  | 0.0122 | 0.0388         | -0.0069     | -0.0048     | 0.0505      |
| $\pi\cdots\pi$ (2)  | 0.0109 | 0.0361         | -0.0063     | -0.0028     | 0.0453      |

|                     |        |        |         |         |        |
|---------------------|--------|--------|---------|---------|--------|
| $\pi \cdots \pi(3)$ | 0.0082 | 0.0244 | -0.0035 | -0.0004 | 0.0283 |
| $\pi \cdots \pi(4)$ | 0.0122 | 0.0388 | -0.0069 | -0.0048 | 0.0505 |
| $\pi \cdots \pi(4)$ | 0.0109 | 0.0362 | -0.0063 | -0.0028 | 0.0453 |
| $\pi \cdots \pi(4)$ | 0.0082 | 0.0244 | -0.0035 | -0.0004 | 0.0284 |

## 11. Comparison of complexation properties

**Table S7.** Comparison of complexation properties between Pagoda[n]arenes and other reported hosts.

| Host                                                                                | Guest                                                                               | FL | $K_a[M^{-1}]$                  | Solvent                                     | Testing method of $K_a$      | Ref.                                      |
|-------------------------------------------------------------------------------------|-------------------------------------------------------------------------------------|----|--------------------------------|---------------------------------------------|------------------------------|-------------------------------------------|
| 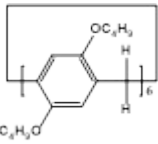   |    | NO | $(3.7 \pm 1.0) \times 10^4$    | CDCl <sub>3</sub> /CD <sub>3</sub> CN = 5/1 | <sup>1</sup> H NMR Titration | Chem. Commun., 2013, 49, 5085-5087.       |
|    |    | NO | $(4.0 \pm 1.0) \times 10^{12}$ | Water                                       | ITC                          | J. Am. Chem. Soc. 2005, 127, 12984–12989. |
|   |   | NO | $1.3 \times 10^8$              | EDC/Acetone =1:1                            | CV                           | J. Am. Chem. Soc. 2019, 141, 4468–4473.   |
|                                                                                     |  | NO | $(6.1 \pm 1.9) \times 10^9$    | EDC/Acetone =1:1                            | ITC                          |                                           |
|  |  | NO | $(2.0 \pm 0.2) \times 10^3$    | NaCl aqueous solution                       | CV                           | Inorg. Chem. 1998, 37, 317-320.           |

|                                                                                    |                                                                                     |     |                             |                       |                    |                                                             |
|------------------------------------------------------------------------------------|-------------------------------------------------------------------------------------|-----|-----------------------------|-----------------------|--------------------|-------------------------------------------------------------|
| 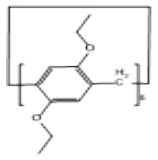  |    | NO  | $(0.9 \pm 0.2) \times 10^2$ | CDCl <sub>3</sub>     | <sup>1</sup> H NMR | Org. Lett. 2020, 22, 4, 1552–1556.                          |
|   |    | NO  | $5.5 \times 10^4$           | NaCl aqueous solution | CV                 | Journal of Electroanalytical Chemistry, 2002, 523, 126–135. |
|   |    | YES | $2.46 \times 10^4$          | CHCl <sub>3</sub>     | Fl titration       | J. Am. Chem. Soc. 2022, 144, 20351–20362.                   |
|                                                                                    |    | YES | $4.79 \times 10^7$          | CHCl <sub>3</sub>     | Fl titration       |                                                             |
|  |   | NO  | $(1.9 \pm 0.2) \times 10^3$ | NaCl aqueous solution | RDV                | J. Org. Chem. 1991, 56, 35-41.                              |
|                                                                                    |  | NO  | $(1.4 \pm 0.1) \times 10^3$ | NaCl aqueous solution | RDV                |                                                             |

|                                                                                    |                                                                                     |    |                             |                                                                |     |                                              |
|------------------------------------------------------------------------------------|-------------------------------------------------------------------------------------|----|-----------------------------|----------------------------------------------------------------|-----|----------------------------------------------|
|   |    | NO | $2.2 \times 10^3$           | NaCl aqueous solution                                          | CV  | Inorg. Chem. 1998, 37, 317-320.              |
|                                                                                    |    | NO | $(1.8 \pm 0.2) \times 10^3$ | 0.1 M Ph=7 phosphate buffer                                    | CV  |                                              |
|   |    | NO | $(4.3 \pm 1.0) \times 10^4$ | CH <sub>2</sub> Cl <sub>2</sub> /CH <sub>3</sub> CN (1/1, v/v) | ITC | Beilstein J. Org. Chem. 2018, 14, 1570–1577. |
|  |   | NO | $4.4 \times 10^2$           | NaCl aqueous solution                                          | CV  | J. Electroanal. Chem. 2002, 523, 126–135.    |
|                                                                                    |  | NO | $5.5 \times 10^4$           | NaCl aqueous solution                                          | CV  |                                              |



|                                                                                   |                                                                                   |     |                             |                                                     |              |           |
|-----------------------------------------------------------------------------------|-----------------------------------------------------------------------------------|-----|-----------------------------|-----------------------------------------------------|--------------|-----------|
| 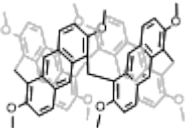 |  | YES | $(4.3 \pm 0.7) \times 10^3$ | CHCl <sub>3</sub> /CH <sub>3</sub> CN<br>(4/1, v/v) | Fl titration | This Work |
|                                                                                   |  | YES | $(1.4 \pm 0.2) \times 10^4$ | CHCl <sub>3</sub> /CH <sub>3</sub> CN<br>(4/1, v/v) | Fl titration |           |
|  |  | YES | $(1.5 \pm 0.7) \times 10^3$ | CHCl <sub>3</sub> /CH <sub>3</sub> CN<br>(4/1, v/v) | Fl titration |           |
|                                                                                   |  | YES | $(4.3 \pm 0.4) \times 10^4$ | CHCl <sub>3</sub> /CH <sub>3</sub> CN<br>(4/1, v/v) | Fl titration |           |
|                                                                                   |  | YES | $(2.5 \pm 0.1) \times 10^5$ | CHCl <sub>3</sub> /CH <sub>3</sub> CN<br>(4/1, v/v) | Fl titration |           |

## 12. The atomic coordinates of optimized structures

The atomic coordinates of **Cob<sup>+</sup>**:

|    |             |             |             |
|----|-------------|-------------|-------------|
| C  | 1.67815462  | -0.52719633 | 1.09473369  |
| C  | 1.67779285  | -1.20429634 | -0.16326791 |
| C  | 1.67728079  | -0.21694155 | -1.19575441 |
| C  | 1.67760458  | 1.07011104  | -0.57601456 |
| C  | 1.67820936  | 0.87844516  | 0.83954037  |
| C  | -1.67834353 | -0.57030961 | 1.07290333  |
| C  | -1.67832545 | 0.84435566  | 0.87360844  |
| C  | -1.67747430 | -1.19686552 | -0.21099725 |
| C  | -1.67755935 | 1.09205851  | -0.53328829 |
| C  | -1.67704511 | -0.16941319 | -1.20356978 |
| Co | -0.00007197 | -0.00000047 | 0.00053776  |
| H  | 1.64651001  | -0.99598164 | 2.06895894  |
| H  | 1.64574074  | -2.27555452 | -0.30848214 |
| H  | 1.64445894  | -0.40995428 | -2.25944617 |
| H  | 1.64472336  | 2.02206064  | -1.08825009 |
| H  | 1.64619088  | 1.65978939  | 1.58665575  |
| H  | -1.64691490 | -1.07751441 | 2.02771902  |
| H  | -1.64680734 | 1.59555797  | 1.65107910  |
| H  | -1.64501976 | -2.26147877 | -0.39875400 |
| H  | -1.64460758 | 2.06360318  | -1.00733153 |
| H  | -1.64409787 | -0.32020173 | -2.27403013 |

The atomic coordinates of **Fe<sup>+</sup>**:

|    |             |             |             |
|----|-------------|-------------|-------------|
| C  | 1.70301500  | -0.48831700 | -1.11380200 |
| C  | 1.70215100  | 0.90871700  | -0.80849900 |
| C  | 1.70197300  | 1.05021800  | 0.61428400  |
| C  | 1.70179700  | -0.25938600 | 1.18839600  |
| C  | 1.70310600  | -1.21045500 | 0.12041500  |
| C  | -1.70271100 | -0.44530100 | -1.13170200 |
| C  | -1.70281000 | -1.21427000 | 0.07391500  |
| C  | -1.70203800 | 0.93902600  | -0.77339200 |
| C  | -1.70211200 | -0.30484600 | 1.17753600  |
| C  | -1.70209100 | 1.02585000  | 0.65375600  |
| Fe | -0.00006900 | -0.00034200 | -0.00024300 |
| H  | 1.66854900  | -0.92248900 | -2.10396800 |
| H  | 1.66710700  | 1.71631400  | -1.52715400 |
| H  | 1.66703500  | 1.98327100  | 1.15991500  |
| H  | 1.66675800  | -0.48988800 | 2.24474300  |
| H  | 1.66898800  | -2.28616700 | 0.22723600  |
| H  | -1.66820500 | -0.84121900 | -2.13770300 |
| H  | -1.66842500 | -2.29332200 | 0.13944300  |
| H  | -1.66668800 | 1.77351900  | -1.46059900 |

|   |             |             |            |
|---|-------------|-------------|------------|
| H | -1.66749700 | -0.57587500 | 2.22429300 |
| H | -1.66749300 | 1.93733400  | 1.23468300 |

The atomic coordinates of **P4**:

|   |             |             |             |
|---|-------------|-------------|-------------|
| O | -5.72937345 | -0.23276798 | 2.75532935  |
| O | 0.23276798  | 5.72937345  | -2.75532935 |
| O | -0.23276798 | 5.72937345  | 2.75532935  |
| O | 5.72937345  | -0.23276798 | -2.75532935 |
| O | 5.72937345  | 0.23276798  | 2.75532935  |
| O | -0.23276798 | -5.72937345 | -2.75532935 |
| O | 0.23276798  | -5.72937345 | 2.75532935  |
| O | -5.72937345 | 0.23276798  | -2.75532935 |
| C | -4.71461481 | 0.87859106  | 0.94823301  |
| C | -4.86236631 | 0.74384043  | 2.31683866  |
| C | -4.13258360 | 1.55387186  | 3.23482913  |
| H | -4.26895472 | 1.42366893  | 4.30157006  |
| C | -3.24900718 | 2.49024182  | 2.77449771  |
| H | -2.68067049 | 3.09844663  | 3.47365097  |
| C | -3.04436912 | 2.68063772  | 1.37956451  |
| C | -2.12180379 | 3.62306663  | 0.91175113  |
| H | -1.59860517 | 4.22524494  | 1.64205205  |
| C | -1.87716689 | 3.80832640  | -0.45417877 |
| C | -0.87859106 | 4.71461481  | -0.94823301 |
| C | -0.74384043 | 4.86236631  | -2.31683866 |
| C | -1.55387186 | 4.13258360  | -3.23482913 |
| H | -1.42366893 | 4.26895472  | -4.30157006 |
| C | -2.49024182 | 3.24900718  | -2.77449771 |
| H | -3.09844663 | 2.68067049  | -3.47365097 |
| C | -2.68063772 | 3.04436912  | -1.37956451 |
| C | -3.62306663 | 2.12180379  | -0.91175113 |
| H | -4.22524494 | 1.59860517  | -1.64205205 |
| C | -3.80832640 | 1.87716689  | 0.45417877  |
| C | -5.81015717 | -0.50979854 | 4.14078623  |
| H | -6.50349203 | -1.34763325 | 4.23525850  |
| H | -6.20156751 | 0.34579146  | 4.70651366  |
| H | -4.83494322 | -0.79864483 | 4.55528351  |
| C | 0.50979854  | 5.81015717  | -4.14078623 |
| H | 0.79864483  | 4.83494322  | -4.55528351 |
| H | 1.34763325  | 6.50349203  | -4.23525850 |
| H | -0.34579146 | 6.20156751  | -4.70651366 |
| C | 0.00000000  | 5.51662138  | 0.00000000  |
| H | -0.63672910 | 6.17114485  | 0.60055962  |
| H | 0.63672910  | 6.17114485  | -0.60055962 |
| C | 0.87859106  | 4.71461481  | 0.94823301  |
| C | 0.74384043  | 4.86236631  | 2.31683866  |

|   |             |             |             |
|---|-------------|-------------|-------------|
| C | 1.55387186  | 4.13258360  | 3.23482913  |
| H | 1.42366893  | 4.26895472  | 4.30157006  |
| C | 2.49024182  | 3.24900718  | 2.77449771  |
| H | 3.09844663  | 2.68067049  | 3.47365097  |
| C | 2.68063772  | 3.04436912  | 1.37956451  |
| C | 3.62306663  | 2.12180379  | 0.91175113  |
| H | 4.22524494  | 1.59860517  | 1.64205205  |
| C | 3.80832640  | 1.87716689  | -0.45417877 |
| C | 4.71461481  | 0.87859106  | -0.94823301 |
| C | 4.86236631  | 0.74384043  | -2.31683866 |
| C | 4.13258360  | 1.55387186  | -3.23482913 |
| H | 4.26895472  | 1.42366893  | -4.30157006 |
| C | 3.24900718  | 2.49024182  | -2.77449771 |
| H | 2.68067049  | 3.09844663  | -3.47365097 |
| C | 3.04436912  | 2.68063772  | -1.37956451 |
| C | 2.12180379  | 3.62306663  | -0.91175113 |
| H | 1.59860517  | 4.22524494  | -1.64205205 |
| C | 1.87716689  | 3.80832640  | 0.45417877  |
| C | -0.50979854 | 5.81015717  | 4.14078623  |
| H | -0.79864483 | 4.83494322  | 4.55528351  |
| H | -1.34763325 | 6.50349203  | 4.23525850  |
| H | 0.34579146  | 6.20156751  | 4.70651366  |
| C | 5.81015717  | -0.50979854 | -4.14078623 |
| H | 4.83494322  | -0.79864483 | -4.55528351 |
| H | 6.50349203  | -1.34763325 | -4.23525850 |
| H | 6.20156751  | 0.34579146  | -4.70651366 |
| C | 5.51662138  | -0.00000000 | 0.00000000  |
| H | 6.17114485  | 0.63672910  | 0.60055962  |
| H | 6.17114485  | -0.63672910 | -0.60055962 |
| C | 4.71461481  | -0.87859106 | 0.94823301  |
| C | 3.80832640  | -1.87716689 | 0.45417877  |
| C | 3.62306663  | -2.12180379 | -0.91175113 |
| H | 4.22524494  | -1.59860517 | -1.64205205 |
| C | 2.68063772  | -3.04436912 | -1.37956451 |
| C | 2.49024182  | -3.24900718 | -2.77449771 |
| H | 3.09844663  | -2.68067049 | -3.47365097 |
| C | 1.55387186  | -4.13258360 | -3.23482913 |
| H | 1.42366893  | -4.26895472 | -4.30157006 |
| C | 0.74384043  | -4.86236631 | -2.31683866 |
| C | 0.87859106  | -4.71461481 | -0.94823301 |
| C | 1.87716689  | -3.80832640 | -0.45417877 |
| C | 2.12180379  | -3.62306663 | 0.91175113  |
| H | 1.59860517  | -4.22524494 | 1.64205205  |
| C | 3.04436912  | -2.68063772 | 1.37956451  |

|   |             |             |             |
|---|-------------|-------------|-------------|
| C | 3.24900718  | -2.49024182 | 2.77449771  |
| H | 2.68067049  | -3.09844663 | 3.47365097  |
| C | 4.13258360  | -1.55387186 | 3.23482913  |
| H | 4.26895472  | -1.42366893 | 4.30157006  |
| C | 4.86236631  | -0.74384043 | 2.31683866  |
| C | 5.81015717  | 0.50979854  | 4.14078623  |
| H | 6.20156751  | -0.34579146 | 4.70651366  |
| H | 4.83494322  | 0.79864483  | 4.55528351  |
| H | 6.50349203  | 1.34763325  | 4.23525850  |
| C | -0.50979854 | -5.81015717 | -4.14078623 |
| H | -1.34763325 | -6.50349203 | -4.23525850 |
| H | 0.34579146  | -6.20156751 | -4.70651366 |
| H | -0.79864483 | -4.83494322 | -4.55528351 |
| C | -0.00000000 | -5.51662138 | 0.00000000  |
| H | -0.63672910 | -6.17114485 | -0.60055962 |
| H | 0.63672910  | -6.17114485 | 0.60055962  |
| C | -0.87859106 | -4.71461481 | 0.94823301  |
| C | -0.74384043 | -4.86236631 | 2.31683866  |
| C | -1.55387186 | -4.13258360 | 3.23482913  |
| H | -1.42366893 | -4.26895472 | 4.30157006  |
| C | -2.49024182 | -3.24900718 | 2.77449771  |
| H | -3.09844663 | -2.68067049 | 3.47365097  |
| C | -2.68063772 | -3.04436912 | 1.37956451  |
| C | -3.62306663 | -2.12180379 | 0.91175113  |
| H | -4.22524494 | -1.59860517 | 1.64205205  |
| C | -3.80832640 | -1.87716689 | -0.45417877 |
| C | -4.71461481 | -0.87859106 | -0.94823301 |
| C | -4.86236631 | -0.74384043 | -2.31683866 |
| C | -4.13258360 | -1.55387186 | -3.23482913 |
| H | -4.26895472 | -1.42366893 | -4.30157006 |
| C | -3.24900718 | -2.49024182 | -2.77449771 |
| H | -2.68067049 | -3.09844663 | -3.47365097 |
| C | -3.04436912 | -2.68063772 | -1.37956451 |
| C | -2.12180379 | -3.62306663 | -0.91175113 |
| H | -1.59860517 | -4.22524494 | -1.64205205 |
| C | -1.87716689 | -3.80832640 | 0.45417877  |
| C | 0.50979854  | -5.81015717 | 4.14078623  |
| H | -0.34579146 | -6.20156751 | 4.70651366  |
| H | 0.79864483  | -4.83494322 | 4.55528351  |
| H | 1.34763325  | -6.50349203 | 4.23525850  |
| C | -5.81015717 | 0.50979854  | -4.14078623 |
| H | -6.20156751 | -0.34579146 | -4.70651366 |
| H | -4.83494322 | 0.79864483  | -4.55528351 |
| H | -6.50349203 | 1.34763325  | -4.23525850 |

|   |             |             |             |
|---|-------------|-------------|-------------|
| C | -5.51662138 | 0.00000000  | 0.00000000  |
| H | -6.17114485 | -0.63672910 | 0.60055962  |
| H | -6.17114485 | 0.63672910  | -0.60055962 |

The atomic coordinates of **P5**:

|   |             |             |             |
|---|-------------|-------------|-------------|
| O | -6.34474166 | -2.34136090 | 2.74070717  |
| O | 0.27007838  | -6.83362380 | 2.75682744  |
| O | 6.41927590  | -1.84182049 | 2.85233886  |
| O | 3.78072986  | 5.66024210  | 2.73979808  |
| O | 0.83807375  | -6.78927420 | -2.75689748 |
| O | 6.65048588  | -1.29388370 | -2.73967775 |
| O | 3.28477102  | 5.93757554  | -2.77381343 |
| O | -6.03866448 | -2.84742427 | -2.85004810 |
| O | -4.65160543 | 4.97930181  | -2.74158391 |
| O | -4.19861694 | 5.33793167  | 2.77265408  |
| C | -4.91123770 | 4.84642301  | -4.12653908 |
| C | -3.34656375 | 5.04744925  | -2.30546111 |
| C | -2.26164132 | 5.10885647  | -3.22805702 |
| C | -0.97529484 | 5.19205963  | -2.77347414 |
| C | -3.14257718 | 5.04655454  | -0.93688699 |
| C | -0.69156316 | 5.21449083  | -1.37944117 |
| C | -1.79355473 | 5.13540920  | -0.44952303 |
| C | 0.62443656  | 5.33310467  | -0.91815546 |
| C | -1.48387580 | 5.17352853  | 0.91488664  |
| C | 0.93559531  | 5.35428229  | 0.44636165  |
| C | -0.16586673 | 5.26563118  | 1.37620194  |
| C | 2.28125397  | 5.48355426  | 0.93444695  |
| C | 0.11660916  | 5.29539333  | 2.77031798  |
| C | 1.39972211  | 5.41627446  | 3.22540785  |
| C | 2.48143627  | 5.52177060  | 2.30308439  |
| C | 4.05551325  | 5.58115085  | 4.12585716  |
| C | 3.45431511  | 5.67672354  | -0.01642871 |
| C | 3.08369621  | 6.13593085  | -4.16071282 |
| C | 3.74622648  | 4.71862398  | -2.32942696 |
| C | 3.80780106  | 4.53458566  | -0.95851834 |
| C | 4.13473986  | 3.69770001  | -3.24441076 |
| C | 4.60560307  | 2.50084245  | -2.78022337 |
| C | 4.71137825  | 2.24914717  | -1.38497355 |
| C | 4.30009338  | 3.27967996  | -0.46260853 |
| C | 4.42583440  | 3.00390640  | 0.90544976  |
| C | 5.22357863  | 1.03377226  | -0.91266565 |
| C | 5.33291327  | 0.75424414  | 0.45171223  |
| C | 4.91072710  | 1.78023566  | 1.37713260  |
| C | 5.00853425  | 1.52934263  | 2.77908580  |
| C | 5.50725283  | 0.34455934  | 3.23504341  |

|   |             |             |             |
|---|-------------|-------------|-------------|
| C | 5.94990865  | -0.65079409 | 2.31592649  |
| C | 5.87527153  | -0.48624862 | 0.95075712  |
| C | 7.72760706  | -1.75814097 | 3.40824048  |
| C | 6.43807117  | -1.54752254 | 0.01679370  |
| C | 6.78573988  | -1.04242369 | -4.12563392 |
| C | 5.64141800  | -2.12533170 | -2.30300915 |
| C | 4.80213946  | -2.81754133 | -3.22404580 |
| C | 5.47915659  | -2.24725600 | -0.93463210 |
| C | 3.81699145  | -3.64772833 | -2.76655345 |
| C | 3.60584740  | -3.83642669 | -1.37222979 |
| C | 4.44892452  | -3.12068117 | -0.44372773 |
| C | 4.22921783  | -3.33811865 | 0.92123032  |
| C | 2.61772154  | -4.71286693 | -0.90919282 |
| C | 2.38346878  | -4.91441580 | 0.45617733  |
| C | 3.22249048  | -4.19312998 | 1.38381147  |
| C | 3.01970737  | -4.38313164 | 2.77925456  |
| C | 2.05414453  | -5.23575170 | 3.23665675  |
| C | 1.23858123  | -5.95776195 | 2.31678339  |
| C | 1.37488078  | -5.81255614 | 0.94741958  |
| C | 0.00423230  | -6.92893598 | 4.14338812  |
| C | 0.54296716  | -6.66522103 | -0.00033283 |
| C | 1.11683117  | -6.84048289 | -4.14324208 |
| C | -0.25695241 | -6.07799330 | -2.31705279 |
| C | -1.17448037 | -5.49056787 | -3.23675742 |
| C | -2.26149672 | -4.79956164 | -2.77921255 |
| C | -1.55433912 | -5.23239069 | -0.45634960 |
| C | -2.49413100 | -4.64788740 | -1.38375774 |
| C | -0.41548168 | -5.95796929 | -0.94760583 |
| C | -1.82049967 | -5.07597281 | 0.90901909  |
| C | -3.62370121 | -3.96341364 | -0.92100940 |
| C | -3.87849201 | -3.78973071 | 0.44413241  |
| C | -2.93529489 | -4.36789299 | 1.37238553  |
| C | -3.17600668 | -4.21964742 | 2.76683313  |
| C | -4.27931866 | -3.55474814 | 3.22467684  |
| C | -5.21588450 | -3.00089278 | 2.30387931  |
| C | -5.03558290 | -3.09333847 | 0.93543574  |
| C | -6.51927130 | -2.11512887 | 4.12666994  |
| C | -6.09770119 | -2.56163488 | -0.01544794 |
| C | -7.34292648 | -2.98362830 | -3.40510663 |
| C | -5.77382518 | -1.59473044 | -2.31418499 |
| C | -5.50593290 | -0.53900585 | -3.23353820 |
| C | -5.20665187 | 0.71114663  | -2.77752114 |
| C | -5.72284382 | -1.42068901 | -0.94902818 |
| C | -5.14604208 | 0.97373991  | -1.37569029 |

|   |             |             |             |
|---|-------------|-------------|-------------|
| C | -5.39165136 | -0.10791871 | -0.44999988 |
| C | -4.02348622 | 5.56665213  | 4.15843684  |
| C | -4.67558492 | 2.99036241  | 3.24480424  |
| C | -4.94913353 | 1.73328017  | 2.78128137  |
| C | -5.01740023 | 1.46787961  | 1.38624380  |
| C | -5.32619383 | 0.18534033  | 0.91433276  |
| C | -4.45987837 | 4.06066505  | 2.32930475  |
| C | -4.49548189 | 3.86948911  | 0.95852440  |
| C | -4.78125906 | 2.55169181  | 0.46350546  |
| C | -4.86501161 | 2.25971145  | -0.90433173 |
| C | -4.33033589 | 5.05300413  | 0.01497682  |
| H | -5.99496243 | 4.75111524  | -4.21608436 |
| H | -4.57964927 | 5.72800309  | -4.69043719 |
| H | -4.43401059 | 3.95065253  | -4.54590878 |
| H | -2.45455713 | 5.09579796  | -4.29385769 |
| H | -0.14760925 | 5.24434612  | -3.47619379 |
| H | 1.41022551  | 5.43611416  | -1.65343035 |
| H | -2.27675856 | 5.15947996  | 1.64975497  |
| H | -0.70968329 | 5.22116171  | 3.47270445  |
| H | 1.59143819  | 5.43816890  | 4.29126460  |
| H | 5.14066187  | 5.65709000  | 4.21667653  |
| H | 3.58931600  | 6.40482973  | 4.68208299  |
| H | 3.72307458  | 4.62538837  | 4.55247810  |
| H | 4.33686119  | 5.90670344  | 0.58575890  |
| H | 3.25553392  | 6.56175841  | -0.62600120 |
| H | 2.66446733  | 7.13906105  | -4.25797652 |
| H | 4.02618421  | 6.08356591  | -4.72109756 |
| H | 2.37647493  | 5.40627459  | -4.57715480 |
| H | 4.06429584  | 3.86912808  | -4.31162249 |
| H | 4.90785649  | 1.72274813  | -3.47646643 |
| H | 4.16646411  | 3.75938594  | 1.63369942  |
| H | 5.56415669  | 0.31136603  | -1.64123440 |
| H | 4.66802610  | 2.29561083  | 3.47083019  |
| H | 5.56577068  | 0.12450128  | 4.29689297  |
| H | 7.95510761  | -2.74354032 | 3.82117523  |
| H | 8.46609037  | -1.50247590 | 2.63676346  |
| H | 7.7759955   | -1.00742892 | 4.20789685  |
| H | 6.91085966  | -2.31075551 | 0.64135160  |
| H | 7.22960836  | -1.09040806 | -0.58218570 |
| H | 7.60349997  | -0.32512948 | -4.21765201 |
| H | 7.04119787  | -1.95305993 | -4.68303702 |
| H | 5.87234947  | -0.60542092 | -4.55095654 |
| H | 4.94582611  | -2.69202410 | -4.29034859 |
| H | 3.17935716  | -4.17985856 | -3.46791958 |



|   |             |             |             |
|---|-------------|-------------|-------------|
| H | 4.85838759  | -2.85959752 | 1.65869750  |
| H | 2.04413756  | -5.26126676 | -1.64348514 |
| H | 3.64991516  | -3.83649044 | 3.47560817  |
| H | 1.91613304  | -5.36666462 | 4.30307119  |
| H | -0.82694708 | -7.63039583 | 4.23731088  |
| H | 0.86749795  | -7.31734346 | 4.69933223  |
| H | -0.29032760 | -5.96014976 | 4.56873151  |
| H | -0.03421097 | -7.36891660 | 0.60490430  |
| H | 1.22709441  | -7.26513277 | -0.60560918 |
| H | 2.04981797  | -7.39956596 | -4.23652402 |
| H | 0.32749953  | -7.36238195 | -4.69979510 |
| H | 1.25267454  | -5.83705451 | -4.56853888 |
| H | -1.01627179 | -5.59589933 | -4.30323187 |
| H | -2.96823103 | -4.35651764 | -3.47568001 |
| H | -1.16941850 | -5.53047382 | 1.64276356  |
| H | -4.31810632 | -3.58613633 | -1.65869422 |
| H | -2.46406008 | -4.64749309 | 3.46801118  |
| H | -4.44259318 | -3.45628428 | 4.29099885  |
| H | -7.44055714 | -1.53666095 | 4.21802827  |
| H | -6.62780545 | -3.05477884 | 4.68383195  |
| H | -5.68720252 | -1.53882053 | 4.55292238  |
| H | -6.95436824 | -2.24506469 | 0.58488281  |
| H | -6.43525764 | -3.39322377 | -0.64022535 |
| H | -7.40244035 | -3.99299732 | -3.81853178 |
| H | -8.11336373 | -2.85583130 | -2.63310312 |
| H | -7.51839594 | -2.25149679 | -4.20424430 |
| H | -5.53165780 | -0.76457527 | -4.29553996 |
| H | -4.99907253 | 1.52339470  | -3.46944320 |
| H | -3.77210422 | 6.62461366  | 4.25366800  |
| H | -4.94115746 | 5.36265721  | 4.72532229  |
| H | -3.20436419 | 4.96197120  | 4.56998460  |
| H | -4.62920048 | 3.17091657  | 4.31183685  |
| H | -5.11910282 | 0.91646673  | 3.47801679  |
| H | -5.54207687 | -0.58335248 | 1.64325008  |
| H | -4.73375533 | 3.04749554  | -1.63269725 |
| H | -5.23887269 | 5.13860545  | -0.58630866 |
| H | -4.27438247 | 5.95911252  | 0.62325761  |

The atomic coordinates of **Cob<sup>+</sup>@P4**:

|   |             |             |             |
|---|-------------|-------------|-------------|
| O | -4.19156789 | -3.85459718 | 2.97931547  |
| O | -3.71978882 | 4.60051270  | -2.34188734 |
| O | -3.77085687 | 4.06791707  | 3.13361226  |
| O | 4.59376015  | 3.80351952  | -2.46417341 |
| O | 4.19139323  | 3.85459954  | 2.97942210  |
| O | 3.71991911  | -4.60046286 | -2.34185852 |
| O | 3.77080060  | -4.06800911 | 3.13366668  |

|   |             |             |             |
|---|-------------|-------------|-------------|
| O | -4.59371559 | -3.80357676 | -2.46427415 |
| C | -4.31554471 | -2.32210021 | 1.21384966  |
| C | -4.26966017 | -2.55314626 | 2.57356071  |
| C | -4.23294105 | -1.48672646 | 3.52343165  |
| C | -4.21573498 | -0.19628783 | 3.09551486  |
| C | -4.28788286 | 0.11508320  | 1.70616411  |
| C | -4.20103142 | 1.44020894  | 1.27830401  |
| C | -4.26407939 | 1.78358070  | -0.07556958 |
| C | -3.95526916 | 3.10849911  | -0.54769141 |
| C | -4.08754880 | 3.36039566  | -1.89710789 |
| C | -4.55721035 | 2.35779732  | -2.80204116 |
| C | -4.79492713 | 1.08685232  | -2.36660665 |
| C | -4.60132786 | 0.73341881  | -0.99976858 |
| C | -4.65807664 | -0.60280333 | -0.57524843 |
| C | -4.42512327 | -0.95919245 | 0.75885289  |
| C | -4.28420120 | -4.15313714 | 4.35743235  |
| C | -4.01845290 | 4.96565511  | -3.67329237 |
| C | -3.54163598 | 4.23369845  | 0.39497620  |
| C | -2.32621121 | 4.03233112  | 1.29058737  |
| C | -2.49373567 | 3.98587158  | 2.66025306  |
| C | -1.39371964 | 3.81895791  | 3.55633418  |
| C | -0.12776948 | 3.71736845  | 3.07218449  |
| C | 0.12808523  | 3.80266514  | 1.67257516  |
| C | 1.44020250  | 3.72671982  | 1.20030819  |
| C | 1.75336157  | 3.83459919  | -0.15840626 |
| C | 3.10426837  | 3.71740548  | -0.65564438 |
| C | 3.31746195  | 3.94224442  | -2.00116192 |
| C | 2.24436734  | 4.28762042  | -2.88304147 |
| C | 0.95997533  | 4.35050485  | -2.42585879 |
| C | 0.65586437  | 4.10539166  | -1.05346371 |
| C | -0.66533153 | 4.17243870  | -0.58045143 |
| C | -0.97928428 | 3.99569355  | 0.77328181  |
| C | -3.98884120 | 4.16150404  | 4.52715801  |
| C | 4.88899851  | 4.18760485  | -3.79121323 |
| C | 4.31317911  | 3.50010408  | 0.25484420  |
| C | 4.31553650  | 2.32211523  | 1.21397057  |
| C | 4.42518594  | 0.95921321  | 0.75896727  |
| C | 4.65821939  | 0.60282639  | -0.57512083 |
| C | 4.60145267  | -0.73339165 | -0.99965940 |
| C | 4.79508167  | -1.08680921 | -2.36649622 |
| C | 4.55735093  | -2.35774224 | -2.80196014 |
| C | 4.08764042  | -3.36034325 | -1.89705840 |
| C | 3.95532291  | -3.10846490 | -0.54764134 |
| C | 4.26414222  | -1.78355976 | -0.07548827 |
| C | 4.20104726  | -1.44019481 | 1.27838537  |
| C | 4.28788509  | -0.11507235 | 1.70625896  |
| C | 4.21565661  | 0.19628327  | 3.09560836  |
| C | 4.23280649  | 1.48671844  | 3.52354050  |
| C | 4.26953885  | 2.55314721  | 2.57368083  |
| C | 4.28345300  | 4.15312349  | 4.35757867  |

|   |             |             |             |
|---|-------------|-------------|-------------|
| C | 4.01840868  | -4.96548827 | -3.67333177 |
| C | 3.54166977  | -4.23368977 | 0.39499153  |
| C | 2.32622159  | -4.03234363 | 1.29057316  |
| C | 2.49370366  | -3.98592096 | 2.66024551  |
| C | 1.39367569  | -3.81896105 | 3.55630085  |
| C | 0.12774377  | -3.71731665 | 3.07211928  |
| C | -0.12807422 | -3.80261418 | 1.67250228  |
| C | -1.44018160 | -3.72666183 | 1.20021689  |
| C | -1.75332750 | -3.83456548 | -0.15849835 |
| C | -3.10422873 | -3.71738553 | -0.65575718 |
| C | -3.31741281 | -3.94227338 | -2.00126826 |
| C | -2.24431811 | -4.28772953 | -2.88311655 |
| C | -0.95992910 | -4.35059732 | -2.42591510 |
| C | -0.65582266 | -4.10541182 | -1.05353084 |
| C | 0.66537070  | -4.17246528 | -0.58050073 |
| C | 0.97930761  | -3.99567514 | 0.77323000  |
| C | 3.98866327  | -4.16210806 | 4.52720009  |
| C | -4.88890937 | -4.18743824 | -3.79138667 |
| C | -4.31315910 | -3.50007469 | 0.25470581  |
| H | -4.19031511 | -1.70419034 | 4.58357864  |
| H | -4.14543889 | 0.62083292  | 3.80852833  |
| H | -4.09282134 | 2.21381003  | 2.02893854  |
| H | -4.70131213 | 2.59776114  | -3.84896750 |
| H | -5.11383986 | 0.31920722  | -3.06734856 |
| H | -4.83988547 | -1.37803107 | -1.31869126 |
| H | -4.29152873 | -5.24058960 | 4.42552883  |
| H | -5.20834077 | -3.75514245 | 4.79052900  |
| H | -3.42315722 | -3.76354501 | 4.91383785  |
| H | -3.44739876 | 4.36736172  | -4.39425135 |
| H | -3.72915902 | 6.01217111  | -3.76744767 |
| H | -5.08870093 | 4.86514071  | -3.88528993 |
| H | -4.39244589 | 4.45437494  | 1.04599274  |
| H | -3.38059468 | 5.12959725  | -0.21011510 |
| H | -1.56762461 | 3.76570976  | 4.62397535  |
| H | 0.71199337  | 3.57673733  | 3.74746829  |
| H | 2.23234335  | 3.63161965  | 1.93093833  |
| H | 2.44927493  | 4.49471634  | -3.92675689 |
| H | 0.15143120  | 4.61407529  | -3.10409352 |
| H | -1.46119478 | 4.39924148  | -1.28946130 |
| H | -3.68188124 | 3.24557446  | 5.04593994  |
| H | -5.06268695 | 4.29984987  | 4.64966409  |
| H | -3.46025982 | 5.01939019  | 4.95685721  |
| H | 4.37930441  | 3.54644581  | -4.52080736 |
| H | 5.96639495  | 4.06786188  | -3.90245841 |
| H | 4.62052013  | 5.23398292  | -3.97454341 |
| H | 4.43891521  | 4.40954859  | 0.85016481  |
| H | 5.19566868  | 3.43290633  | -0.38543931 |
| H | 4.84006186  | 1.37805294  | -1.31855686 |
| H | 5.11404049  | -0.31916129 | -3.06721419 |
| H | 4.70149027  | -2.59769425 | -3.84888408 |

|    |             |             |             |
|----|-------------|-------------|-------------|
| H  | 4.09279457  | -2.21379483 | 2.02901247  |
| H  | 4.14534095  | -0.62084741 | 3.80860892  |
| H  | 4.19013202  | 1.70416071  | 4.58368877  |
| H  | 5.20753067  | 3.75533900  | 4.79100195  |
| H  | 3.42230109  | 3.76330490  | 4.91365853  |
| H  | 4.29049239  | 5.24057549  | 4.42570207  |
| H  | 3.72901584  | -6.01196992 | -3.76756335 |
| H  | 5.08864219  | -4.86504552 | -3.88543898 |
| H  | 3.44732755  | -4.36706638 | -4.39416385 |
| H  | 3.38065585  | -5.12957430 | -0.21012699 |
| H  | 4.39246337  | -4.45437376 | 1.04602657  |
| H  | 1.56756494  | -3.76570991 | 4.62394563  |
| H  | -0.71203419 | -3.57664521 | 3.74737624  |
| H  | -2.23231873 | -3.63154449 | 1.93084184  |
| H  | -2.44922015 | -4.49494786 | -3.92680768 |
| H  | -0.15138330 | -4.61423797 | -3.10412102 |
| H  | 1.46123326  | -4.39936568 | -1.28948613 |
| H  | 3.45988751  | -5.02004356 | 4.95656106  |
| H  | 3.68183329  | -3.24630049 | 5.04627324  |
| H  | 5.06247465  | -4.30068812 | 4.64974330  |
| H  | -4.62055046 | -5.23382362 | -3.97484934 |
| H  | -4.37908115 | -3.54623911 | -4.52085240 |
| H  | -5.96628345 | -4.06754795 | -3.90268919 |
| H  | -4.43892825 | -4.40952880 | 0.85000548  |
| H  | -5.19562708 | -3.43285111 | -0.38560583 |
| C  | 1.71871917  | 0.47076512  | -0.85000032 |
| C  | 1.51497633  | -0.93612558 | -0.82595334 |
| C  | 1.50098704  | -1.39966781 | -2.17097327 |
| C  | 1.71380928  | -0.28144501 | -3.02407979 |
| C  | 1.85138990  | 0.87360610  | -2.20935271 |
| C  | -1.51502024 | 0.93624962  | -0.82610956 |
| C  | -1.50105430 | 1.39964687  | -2.17118234 |
| C  | -1.71859756 | -0.47066963 | -0.85000686 |
| C  | -1.71370405 | 0.28129298  | -3.02416875 |
| C  | -1.85116653 | -0.87368298 | -2.20931008 |
| Co | 0.00004915  | 0.00009019  | -1.86885186 |
| H  | 1.72215469  | 1.12963565  | 0.00876752  |
| H  | 1.33232703  | -1.53999937 | 0.05296453  |
| H  | 1.30054232  | -2.41402229 | -2.48530294 |
| H  | 1.71643301  | -0.30083195 | -4.10563591 |
| H  | 1.95185225  | 1.89074339  | -2.55832593 |
| H  | -1.33248623 | 1.54023294  | 0.05275438  |
| H  | -1.30076927 | 2.41399716  | -2.48564681 |
| H  | -1.72199725 | -1.12944341 | 0.00883663  |
| H  | -1.71628662 | 0.30054632  | -4.10572720 |
| H  | -1.95146803 | -1.89088184 | -2.55815251 |

The atomic coordinates of **Fe<sup>+</sup>@P4**:

|   |            |             |             |
|---|------------|-------------|-------------|
| O | 5.38259300 | -1.86555400 | -2.75560600 |
| O | 1.35791100 | 5.46959600  | 2.73795400  |

|   |             |             |             |
|---|-------------|-------------|-------------|
| O | 1.82249600  | 5.30376900  | -2.76557000 |
| O | -5.44245300 | 1.29510700  | 2.77430900  |
| O | -5.34876200 | 1.80084900  | -2.72736100 |
| O | -1.30858600 | -5.53366500 | 2.74916600  |
| O | -1.82359400 | -5.39061800 | -2.75250700 |
| O | 5.53660100  | -1.36524500 | 2.74724000  |
| C | 4.83162300  | -0.47487500 | -0.95038200 |
| C | 4.92121300  | -0.65790300 | -2.31578000 |
| C | 4.52966500  | 0.36227900  | -3.23758500 |
| C | 4.04164000  | 1.55074600  | -2.78548200 |
| C | 3.91252400  | 1.80649400  | -1.38937300 |
| C | 3.28933100  | 2.97673600  | -0.93399100 |
| C | 3.07210900  | 3.21098900  | 0.42660300  |
| C | 2.23810000  | 4.28183300  | 0.91772500  |
| C | 2.15510300  | 4.45854700  | 2.28498700  |
| C | 2.86761300  | 3.61973600  | 3.19999900  |
| C | 3.61806300  | 2.57953200  | 2.74331500  |
| C | 3.70705200  | 2.30156500  | 1.34694400  |
| C | 4.30616700  | 1.12049400  | 0.89440700  |
| C | 4.35180000  | 0.79516800  | -0.46645000 |
| C | 5.63313900  | -2.04664400 | -4.13501500 |
| C | 1.38923100  | 5.81437600  | 4.10899100  |
| C | 1.55334600  | 5.27900900  | -0.01279900 |
| C | 0.43094000  | 4.81936000  | -0.93899900 |
| C | 0.59790700  | 4.90980600  | -2.30707800 |
| C | -0.46137300 | 4.60433600  | -3.21856400 |
| C | -1.66664200 | 4.17013800  | -2.75822600 |
| C | -1.89695700 | 4.00203800  | -1.36100100 |
| C | -3.04239300 | 3.33543800  | -0.90477400 |
| C | -3.25106300 | 3.08694400  | 0.45575100  |
| C | -4.29548100 | 2.22159100  | 0.94900400  |
| C | -4.45716200 | 2.12255800  | 2.31708700  |
| C | -3.62774100 | 2.84695300  | 3.22989600  |
| C | -2.61708800 | 3.63453800  | 2.76999500  |
| C | -2.35557500 | 3.74508300  | 1.37219600  |
| C | -1.17841400 | 4.35398100  | 0.91594400  |
| C | -0.85948900 | 4.40129300  | -0.44529200 |
| C | 1.98075800  | 5.60661300  | -4.13745200 |
| C | -5.78967600 | 1.32566700  | 4.14474000  |
| C | -5.28955300 | 1.52692000  | 0.02264700  |
| C | -4.82079500 | 0.41467400  | -0.91084500 |
| C | -4.36910500 | -0.86678600 | -0.42371800 |
| C | -4.28997600 | -1.17988800 | 0.93627400  |
| C | -3.63734100 | -2.33502400 | 1.38861400  |

|   |             |             |             |
|---|-------------|-------------|-------------|
| C | -3.48978600 | -2.58395200 | 2.78459900  |
| C | -2.74277400 | -3.63003800 | 3.23428200  |
| C | -2.08806200 | -4.50236300 | 2.31017700  |
| C | -2.19555200 | -4.32666900 | 0.94499800  |
| C | -3.01487700 | -3.24329800 | 0.46312700  |
| C | -3.26607200 | -3.02743000 | -0.89713400 |
| C | -3.94446500 | -1.88872300 | -1.34661800 |
| C | -4.13235000 | -1.66076900 | -2.74200500 |
| C | -4.60471600 | -0.46697600 | -3.19526000 |
| C | -4.92503800 | 0.58378800  | -2.27778700 |
| C | -5.61357300 | 1.97486000  | -4.10504100 |
| C | -1.31953000 | -5.86939800 | 4.12271500  |
| C | -1.53575500 | -5.31982000 | -0.00207100 |
| C | -0.45191200 | -4.81017000 | -0.94253600 |
| C | -0.62767800 | -4.90433700 | -2.30937700 |
| C | 0.39074300  | -4.49809200 | -3.22813700 |
| C | 1.56365100  | -3.97739100 | -2.77202100 |
| C | 1.80570100  | -3.83132400 | -1.37473000 |
| C | 2.96801000  | -3.20106800 | -0.91582300 |
| C | 3.20036200  | -2.98641700 | 0.44642900  |
| C | 4.30850400  | -2.20547700 | 0.93597800  |
| C | 4.48371800  | -2.11058200 | 2.30257700  |
| C | 3.59240500  | -2.74824200 | 3.22147600  |
| C | 2.52121800  | -3.45480000 | 2.76519100  |
| C | 2.26800900  | -3.58047800 | 1.36766600  |
| C | 1.11150500  | -4.22141200 | 0.90855700  |
| C | 0.80442400  | -4.29925400 | -0.45352400 |
| C | -2.01118200 | -5.60672700 | -4.13699500 |
| C | 5.85345000  | -1.37339100 | 4.12526000  |
| C | 5.31911100  | -1.56466000 | -0.00576400 |
| H | 4.61315100  | 0.18917200  | -4.30353600 |
| H | 3.72695900  | 2.31785100  | -3.48887600 |
| H | 2.93275700  | 3.69310600  | -1.67111200 |
| H | 2.79721600  | 3.80150800  | 4.26548600  |
| H | 4.12866000  | 1.92147300  | 3.44134300  |
| H | 4.73630900  | 0.44589400  | 1.63022800  |
| H | 6.06486300  | -3.04256000 | -4.22985000 |
| H | 6.34585500  | -1.30469900 | -4.51107900 |
| H | 4.70892400  | -1.99605700 | -4.72311800 |
| H | 0.98789600  | 5.01027100  | 4.73716300  |
| H | 0.75639700  | 6.69619400  | 4.20692500  |
| H | 2.40570600  | 6.06012700  | 4.43468500  |
| H | 2.32638200  | 5.72984100  | -0.64111800 |
| H | 1.15755600  | 6.08458100  | 0.61161500  |

|   |             |             |             |
|---|-------------|-------------|-------------|
| H | -0.30287600 | 4.70904200  | -4.28493700 |
| H | -2.45904600 | 3.90829200  | -3.45473400 |
| H | -3.75725600 | 2.97213500  | -1.63972300 |
| H | -3.79632100 | 2.76136100  | 4.29653300  |
| H | -1.96775900 | 4.15769300  | 3.46715300  |
| H | -0.48735100 | 4.76137400  | 1.65030700  |
| H | 1.86181700  | 4.71515900  | -4.76459600 |
| H | 2.99683400  | 5.98623200  | -4.24210700 |
| H | 1.27103700  | 6.37663300  | -4.45894000 |
| H | -4.97776800 | 0.94526900  | 4.77592600  |
| H | -6.65730400 | 0.67389600  | 4.24513700  |
| H | -6.05763400 | 2.33828300  | 4.46493000  |
| H | -5.75518400 | 2.29634500  | -0.59914100 |
| H | -6.08527600 | 1.11804000  | 0.65132800  |
| H | -4.70322900 | -0.49590200 | 1.67434700  |
| H | -3.97073400 | -1.91059400 | 3.48963200  |
| H | -2.63930300 | -3.79542200 | 4.29993700  |
| H | -2.92378000 | -3.74855800 | -1.63537800 |
| H | -3.85490300 | -2.44448200 | -3.44204000 |
| H | -4.72266200 | -0.30835700 | -4.26013600 |
| H | -6.36656000 | 1.26243700  | -4.45918000 |
| H | -4.70270200 | 1.87373000  | -4.70702500 |
| H | -6.00125800 | 2.98822000  | -4.20637300 |
| H | -0.71772600 | -6.77349100 | 4.21149300  |
| H | -2.33668400 | -6.07396600 | 4.47401200  |
| H | -0.87323500 | -5.07761100 | 4.73616100  |
| H | -1.10954800 | -6.12307700 | 0.60493300  |
| H | -2.31751600 | -5.77753000 | -0.61405200 |
| H | 0.22603800  | -4.59229000 | -4.29437700 |
| H | 2.32787300  | -3.64872700 | -3.47182100 |
| H | 3.69628600  | -2.86805900 | -1.65086000 |
| H | 3.76182000  | -2.66060100 | 4.28779900  |
| H | 1.83284700  | -3.92156700 | 3.46503600  |
| H | 0.43890100  | -4.65733500 | 1.64280100  |
| H | -1.26744900 | -6.30485900 | -4.53613200 |
| H | -1.96977900 | -4.66692600 | -4.70047200 |
| H | -3.00472400 | -6.04274900 | -4.23697500 |
| H | 6.03200100  | -2.39193900 | 4.48660100  |
| H | 5.06281100  | -0.90609900 | 4.72421000  |
| H | 6.76891100  | -0.79027800 | 4.22213200  |
| H | 5.76611300  | -2.35551400 | -0.61426600 |
| H | 6.12638400  | -1.15191500 | 0.60501800  |
| C | -1.18533800 | -0.21658100 | 1.76840700  |
| C | -0.16696900 | -1.21092000 | 1.72922700  |

|    |             |             |             |
|----|-------------|-------------|-------------|
| C  | 1.09439400  | -0.54031400 | 1.72973400  |
| C  | 0.84020100  | 0.85940500  | 1.76983300  |
| C  | -0.56188700 | 1.05480300  | 1.79166100  |
| C  | -1.17582000 | -0.26118200 | -1.76480800 |
| C  | -0.60584600 | 1.03422200  | -1.79225800 |
| C  | -0.11905800 | -1.21310300 | -1.73046000 |
| C  | 0.80375300  | 0.89668900  | -1.77750500 |
| C  | 1.11442800  | -0.49275400 | -1.73952400 |
| Fe | -0.00729200 | 0.02017500  | -0.00140900 |
| H  | -2.24855100 | -0.38335200 | 1.71253200  |
| H  | -0.33060700 | -2.27821600 | 1.64037100  |
| H  | 2.07270000  | -0.99551000 | 1.64629900  |
| H  | 1.57078700  | 1.64829100  | 1.73196500  |
| H  | -1.06148500 | 2.00634800  | 1.76331400  |
| H  | -2.22967000 | -0.47197900 | -1.71696400 |
| H  | -1.15279400 | 1.95957300  | -1.76116800 |
| H  | -0.24765800 | -2.28384600 | -1.64417000 |
| H  | 1.50490800  | 1.71355800  | -1.72753700 |
| H  | 2.10848800  | -0.91612200 | -1.65891400 |

The atomic coordinates of [Fe<sup>+</sup>@P5]-I:

|   |             |             |             |
|---|-------------|-------------|-------------|
| O | -2.37225500 | 6.04584000  | 2.77820300  |
| O | -7.33774000 | -0.28982500 | 2.72474100  |
| O | -1.95362200 | -6.12358400 | 2.80043000  |
| O | 5.67220800  | -3.85366000 | 2.68366400  |
| O | -7.25083100 | -0.75766900 | -2.78316100 |
| O | -1.40137900 | -6.28823200 | -2.72967700 |
| O | 5.85698800  | -3.29932600 | -2.83828700 |
| O | -2.88363300 | 5.89870900  | -2.75084400 |
| O | 4.93763300  | 4.59241600  | -2.69186700 |
| O | 5.23995300  | 4.03677600  | 2.83221200  |
| C | 5.05474900  | 4.89009300  | -4.06845800 |
| C | 5.09664900  | 3.30328700  | -2.27522300 |
| C | 5.23728200  | 2.23184300  | -3.21183700 |
| C | 5.37015200  | 0.94835800  | -2.77457900 |
| C | 5.08336600  | 3.07622000  | -0.91448700 |
| C | 5.37255200  | 0.64805700  | -1.38042700 |
| C | 5.24703400  | 1.72985100  | -0.44448100 |
| C | 5.49548500  | -0.66868600 | -0.93147100 |
| C | 5.31487500  | 1.41981800  | 0.91717700  |
| C | 5.47761900  | -0.98554000 | 0.43096000  |
| C | 5.41636500  | 0.10199500  | 1.36625700  |
| C | 5.54934700  | -2.33828600 | 0.90522200  |
| C | 5.46153900  | -0.19121200 | 2.76118100  |
| C | 5.55428500  | -1.47690700 | 3.20155800  |



|   |             |             |             |
|---|-------------|-------------|-------------|
| C | 5.60490100  | -2.55701000 | 2.26603300  |
| C | 5.87683000  | -4.12540300 | 4.05553900  |
| C | 5.63232000  | -3.49545900 | -0.07154200 |
| C | 6.13721300  | -3.45145700 | -4.21584800 |
| C | 4.61732000  | -3.63500600 | -2.37285700 |
| C | 4.44902800  | -3.68525200 | -1.00504800 |
| C | 3.53859900  | -3.90033500 | -3.27358300 |
| C | 2.31837300  | -4.26711400 | -2.79304800 |
| C | 2.08709500  | -4.37547300 | -1.38952300 |
| C | 3.15587100  | -4.04675500 | -0.48819000 |
| C | 2.89666600  | -4.15644700 | 0.88174200  |
| C | 0.85798900  | -4.83234800 | -0.90492000 |
| C | 0.60359400  | -4.95820000 | 0.46481600  |
| C | 1.65729700  | -4.58433000 | 1.36718000  |
| C | 1.42372600  | -4.69210700 | 2.76972900  |
| C | 0.23923900  | -5.16797200 | 3.24307100  |
| C | -0.78320800 | -5.59545700 | 2.33903500  |
| C | -0.63160900 | -5.49189200 | 0.97193300  |
| C | -2.11258500 | -6.34018100 | 4.18684300  |
| C | -1.67169700 | -6.08167900 | 0.03313200  |
| C | -1.47935000 | -6.71900400 | -4.07298800 |
| C | -2.28132200 | -5.33545600 | -2.29031500 |
| C | -3.02735100 | -4.54492800 | -3.21866400 |
| C | -2.39294100 | -5.15493200 | -0.92955800 |
| C | -3.90724600 | -3.60890100 | -2.76937000 |
| C | -4.09601500 | -3.39207100 | -1.37211600 |
| C | -3.31887300 | -4.16608600 | -0.44498400 |
| C | -3.54453400 | -3.95810300 | 0.91783800  |
| C | -5.04117800 | -2.47140700 | -0.91525800 |
| C | -5.25553500 | -2.25051700 | 0.44920300  |
| C | -4.48122600 | -3.02714400 | 1.37577900  |
| C | -4.71369400 | -2.85496100 | 2.77136400  |
| C | -5.65094600 | -1.97524300 | 3.22059300  |
| C | -6.41495800 | -1.20216200 | 2.29387500  |
| C | -6.22888700 | -1.31161100 | 0.93313100  |
| C | -7.65413700 | -0.23482600 | 4.09889000  |
| C | -7.08689800 | -0.50701400 | -0.02687500 |
| C | -7.55063200 | -0.85068600 | -4.15901500 |
| C | -6.50423600 | 0.29731400  | -2.33666700 |
| C | -5.87193100 | 1.19547200  | -3.25016900 |
| C | -5.10245100 | 2.21804500  | -2.78471100 |
| C | -5.56166100 | 1.51490200  | -0.47290300 |
| C | -4.91522400 | 2.41539800  | -1.38563900 |
| C | -6.35886700 | 0.43017400  | -0.97329400 |

|   |             |             |             |
|---|-------------|-------------|-------------|
| C | -5.40389000 | 1.75944600  | 0.89487900  |
| C | -4.14442400 | 3.47988600  | -0.91070800 |
| C | -3.96081800 | 3.70430400  | 0.45600200  |
| C | -4.61886800 | 2.81180800  | 1.36892000  |
| C | -4.47854200 | 3.04153000  | 2.76944800  |
| C | -3.74844200 | 4.09090200  | 3.23630500  |
| C | -3.11343300 | 4.98839200  | 2.32246000  |
| C | -3.19163400 | 4.81062500  | 0.95893300  |
| C | -2.50522000 | 6.43736200  | 4.12883600  |
| C | -2.59477500 | 5.83772900  | 0.01239200  |
| C | -3.07977400 | 6.09152100  | -4.13587500 |
| C | -1.65823500 | 5.50257700  | -2.29996200 |
| C | -0.59678700 | 5.20968700  | -3.21184300 |
| C | 0.63635100  | 4.86689500  | -2.74683300 |
| C | -1.49172900 | 5.39575200  | -0.93476400 |
| C | 0.88600300  | 4.77031400  | -1.34648300 |
| C | -0.20148500 | 5.00353800  | -0.43683500 |
| C | 5.49309600  | 4.16555500  | 4.21700900  |
| C | 2.86008100  | 4.28422200  | 3.27988500  |
| C | 1.59891400  | 4.48666400  | 2.80816900  |
| C | 1.34856500  | 4.58285700  | 1.40681300  |
| C | 0.06970500  | 4.88641100  | 0.93087800  |
| C | 3.96192600  | 4.18665400  | 2.37343600  |
| C | 3.78193400  | 4.22486800  | 1.00657700  |
| C | 2.44794100  | 4.40795500  | 0.49861500  |
| C | 2.17055800  | 4.49299500  | -0.86907600 |
| C | 4.97579900  | 4.22922000  | 0.06655400  |
| H | 4.95820100  | 5.97253800  | -4.14704600 |
| H | 6.02981000  | 4.58240600  | -4.46187900 |
| H | 4.25860000  | 4.41322900  | -4.65275900 |
| H | 5.24055300  | 2.43902200  | -4.27509600 |
| H | 5.47635500  | 0.13280600  | -3.48538900 |
| H | 5.64173800  | -1.44669200 | -1.67275700 |
| H | 5.32731600  | 2.21119300  | 1.65822000  |
| H | 5.41994000  | 0.63289500  | 3.46888900  |
| H | 5.58990500  | -1.67958600 | 4.26516400  |
| H | 5.98589700  | -5.20696100 | 4.13051400  |
| H | 6.78744400  | -3.64201300 | 4.42628600  |
| H | 5.02116200  | -3.80683000 | 4.66286900  |
| H | 5.76545500  | -4.41728700 | 0.50132300  |
| H | 6.53216900  | -3.37255000 | -0.68108400 |
| H | 7.20166100  | -3.24627600 | -4.32699400 |
| H | 5.92528100  | -4.47173300 | -4.55377700 |
| H | 5.56782100  | -2.73982300 | -4.82566800 |

|   |             |             |             |
|---|-------------|-------------|-------------|
| H | 3.69736900  | -3.83240100 | -4.34310300 |
| H | 1.50458900  | -4.50116800 | -3.47491300 |
| H | 3.68306900  | -3.96906800 | 1.60379100  |
| H | 0.11213100  | -5.14254100 | -1.62739900 |
| H | 2.21352600  | -4.39672400 | 3.45588600  |
| H | 0.08338300  | -5.24754800 | 4.31212800  |
| H | -3.09080300 | -6.80582900 | 4.30383300  |
| H | -1.34115800 | -7.01321400 | 4.57759900  |
| H | -2.09241600 | -5.39748000 | 4.74685400  |
| H | -2.42599800 | -6.58290500 | 0.64606300  |
| H | -1.17979000 | -6.86014500 | -0.55713700 |
| H | -0.82227700 | -7.58563200 | -4.14676000 |
| H | -2.50108300 | -7.01218200 | -4.33816000 |
| H | -1.13161000 | -5.94603400 | -4.76895800 |
| H | -2.90230500 | -4.70070600 | -4.28375400 |
| H | -4.49039500 | -3.01813700 | -3.47103600 |
| H | -3.02116700 | -4.55629000 | 1.65509500  |
| H | -5.64477100 | -1.95364200 | -1.65228000 |
| H | -4.13511100 | -3.45012300 | 3.47331000  |
| H | -5.81816600 | -1.86541900 | 4.28540700  |
| H | -8.45029000 | 0.50353500  | 4.19225900  |
| H | -8.01204600 | -1.20325200 | 4.46627500  |
| H | -6.79447500 | 0.08571400  | 4.70006700  |
| H | -7.79509100 | 0.08118100  | 0.56352700  |
| H | -7.68170800 | -1.20156200 | -0.62644000 |
| H | -8.21568600 | -1.70816500 | -4.26112400 |
| H | -8.06156500 | 0.04947900  | -4.51940900 |
| H | -6.64891700 | -1.02173200 | -4.75996800 |
| H | -6.00598700 | 1.06643300  | -4.31756900 |
| H | -4.62624400 | 2.90736300  | -3.47733000 |
| H | -5.92787700 | 1.14890500  | 1.62123300  |
| H | -3.72092100 | 4.16381500  | -1.63723100 |
| H | -4.97399500 | 2.36447600  | 3.46054200  |
| H | -3.65736600 | 4.25207400  | 4.30398400  |
| H | -1.95951900 | 7.37639300  | 4.22249800  |
| H | -3.55578600 | 6.59887800  | 4.39491200  |
| H | -2.06752700 | 5.69934500  | 4.81174500  |
| H | -2.20330400 | 6.66180700  | 0.61587600  |
| H | -3.40730800 | 6.25018100  | -0.59217600 |
| H | -4.10426700 | 6.44700400  | -4.24318700 |
| H | -2.39107500 | 6.84326900  | -4.53723600 |
| H | -2.96235600 | 5.15422500  | -4.69327100 |
| H | -0.76400900 | 5.28635000  | -4.27938900 |
| H | 1.45294600  | 4.67661600  | -3.43884600 |

|    |             |             |             |
|----|-------------|-------------|-------------|
| H  | 6.57547100  | 4.10483400  | 4.32765700  |
| H  | 5.14127500  | 5.13019600  | 4.59827000  |
| H  | 5.02620400  | 3.35521600  | 4.78957300  |
| H  | 3.03175300  | 4.22608700  | 4.34792700  |
| H  | 0.76494500  | 4.59837300  | 3.49649300  |
| H  | -0.70835300 | 5.08468700  | 1.65903000  |
| H  | 2.97086700  | 4.40840800  | -1.59531300 |
| H  | 4.95361600  | 5.16113100  | -0.50488800 |
| H  | 5.88596300  | 4.25329600  | 0.67250000  |
| C  | 2.05785400  | -0.55769000 | 1.75097300  |
| C  | 1.91036900  | 0.86284600  | 1.74046700  |
| C  | 0.51551200  | 1.15893600  | 1.72171000  |
| C  | -0.19809400 | -0.07501100 | 1.72209600  |
| C  | 0.75400500  | -1.13566300 | 1.74073400  |
| C  | 2.03146200  | -0.63428500 | -1.76695700 |
| C  | 0.69689600  | -1.13650000 | -1.75640800 |
| C  | 1.96445600  | 0.79205500  | -1.76972500 |
| C  | -0.19363300 | -0.02346700 | -1.75358600 |
| C  | 0.58859900  | 1.16842100  | -1.76189700 |
| Fe | 1.02785200  | 0.03929500  | -0.01328500 |
| H  | 2.99133400  | -1.10865600 | 1.70716800  |
| H  | 2.71140300  | 1.59305500  | 1.68085300  |
| H  | 0.08193000  | 2.14907600  | 1.64551400  |
| H  | -1.27326900 | -0.18747800 | 1.65985500  |
| H  | 0.53174100  | -2.19499500 | 1.69331700  |
| H  | 2.93414800  | -1.23428000 | -1.71011300 |
| H  | 0.41374600  | -2.18024800 | -1.69017500 |
| H  | 2.80575800  | 1.47451100  | -1.71840300 |
| H  | -1.27357800 | -0.07580000 | -1.69632800 |
| H  | 0.20988200  | 2.18237700  | -1.70889800 |

The atomic coordinates of [Cob<sup>+</sup>@P5]-I:

|   |             |             |             |
|---|-------------|-------------|-------------|
| O | 5.74797600  | 4.28385800  | -2.63845600 |
| O | 5.91574600  | -3.72816400 | -2.86748100 |
| O | -1.56101700 | -5.87178800 | -2.66688800 |
| O | -7.41750000 | -0.26401000 | -2.75148500 |
| O | 5.74905400  | -4.28328000 | 2.63834800  |
| O | -2.12555300 | -5.51075200 | 2.86697400  |
| O | -7.41756300 | 0.26319100  | 2.75142800  |
| O | 5.91527500  | 3.72874200  | 2.86736500  |
| O | -1.56176700 | 5.87149700  | 2.66711400  |
| O | -2.12634600 | 5.51081000  | -2.86676700 |
| C | -1.41318400 | 6.12681800  | 4.05527700  |
| C | -2.43647400 | 4.90476600  | 2.24572400  |
| C | -3.17925500 | 4.11701100  | 3.17604100  |

|   |             |             |             |
|---|-------------|-------------|-------------|
| C | -4.07175100 | 3.18140200  | 2.73044600  |
| C | -2.55822500 | 4.72122300  | 0.87661800  |
| C | -4.26898400 | 2.96503600  | 1.33681900  |
| C | -3.48927100 | 3.73817300  | 0.39975000  |
| C | -5.21584700 | 2.04298600  | 0.87878300  |
| C | -3.71378300 | 3.51749700  | -0.96491500 |
| C | -5.41843600 | 1.79914900  | -0.48687900 |
| C | -4.63573600 | 2.56959900  | -1.42287500 |
| C | -6.36807200 | 0.83937600  | -0.96745600 |
| C | -4.83959700 | 2.36227900  | -2.81678200 |
| C | -5.75816200 | 1.45249800  | -3.26418300 |
| C | -6.52684300 | 0.69077400  | -2.33512800 |
| C | -7.63476400 | -0.45671600 | -4.14055300 |
| C | -7.18413300 | -0.00043900 | -0.00001400 |
| C | -7.63487700 | 0.45591500  | 4.14048500  |
| C | -6.52676800 | -0.69148500 | 2.33512100  |
| C | -6.36796300 | -0.84011900 | 0.96745600  |
| C | -5.75798600 | -1.45306400 | 3.26421000  |
| C | -4.83928500 | -2.36273000 | 2.81685100  |
| C | -4.63538400 | -2.57007900 | 1.42295600  |
| C | -5.41819000 | -1.79977900 | 0.48692400  |
| C | -5.21557800 | -2.04366200 | -0.87872700 |
| C | -3.71331000 | -3.51788300 | 0.96504100  |
| C | -3.48877200 | -3.73858900 | -0.39961500 |
| C | -4.26858600 | -2.96559900 | -1.33672000 |
| C | -4.07132800 | -3.18200500 | -2.73033900 |
| C | -3.17871100 | -4.11751600 | -3.17589400 |
| C | -2.43582400 | -4.90513100 | -2.24554100 |
| C | -2.55759000 | -4.72153400 | -0.87644500 |
| C | -1.41242400 | -6.12716600 | -4.05503600 |
| C | -1.81995800 | -5.62766900 | 0.09544100  |
| C | -2.31369200 | -5.64750700 | 4.26708700  |
| C | -0.93013800 | -5.03692100 | 2.38614500  |
| C | 0.10388100  | -4.60556400 | 3.27174400  |
| C | -0.77126600 | -5.00820200 | 1.00960700  |
| C | 1.32458200  | -4.23836500 | 2.77737400  |
| C | 1.57494600  | -4.23894700 | 1.37467200  |
| C | 0.48813500  | -4.55888900 | 0.47927400  |
| C | 0.74653600  | -4.48085500 | -0.89445100 |
| C | 2.85941100  | -3.99909400 | 0.87343100  |
| C | 3.13840600  | -4.00612300 | -0.50073300 |
| C | 2.02189800  | -4.19194000 | -1.39798500 |
| C | 2.25927300  | -4.14004900 | -2.80089000 |
| C | 3.52464300  | -3.96558400 | -3.29048600 |

|   |             |             |             |
|---|-------------|-------------|-------------|
| C | 4.63382000  | -3.86140000 | -2.40021700 |
| C | 4.46855800  | -3.87733300 | -1.02454000 |
| C | 6.15291900  | -3.71193700 | -4.26585500 |
| C | 5.68138000  | -3.87492400 | -0.10584600 |
| C | 5.79113800  | -4.59510200 | 4.01997700  |
| C | 5.82882300  | -2.97068400 | 2.24232100  |
| C | 5.90042600  | -1.90632100 | 3.18933300  |
| C | 5.91287100  | -0.60632000 | 2.76373100  |
| C | 5.83985600  | -1.37013200 | 0.42162900  |
| C | 5.87453900  | -0.28865000 | 1.37624200  |
| C | 5.78226300  | -2.72613100 | 0.88077300  |
| C | 5.87943300  | -1.03888900 | -0.93887900 |
| C | 5.87937300  | 1.03948700  | 0.93875100  |
| C | 5.83957200  | 1.37072400  | -0.42175000 |
| C | 5.87432000  | 0.28924700  | -1.37636700 |
| C | 5.91242500  | 0.60692300  | -2.76386300 |
| C | 5.89970200  | 1.90692000  | -3.18946600 |
| C | 5.82804300  | 2.97127100  | -2.24244200 |
| C | 5.78170500  | 2.72671500  | -0.88089100 |
| C | 5.78986200  | 4.59569400  | -4.02008700 |
| C | 5.68077900  | 3.87549100  | 0.10573800  |
| C | 6.15250700  | 3.71247100  | 4.26572800  |
| C | 4.63332000  | 3.86187700  | 2.40015500  |
| C | 3.52416400  | 3.96594300  | 3.29046800  |
| C | 2.25876000  | 4.14029800  | 2.80092000  |
| C | 4.46800100  | 3.87780400  | 1.02448600  |
| C | 2.02132900  | 4.19218700  | 1.39802200  |
| C | 3.13781900  | 4.00647700  | 0.50073000  |
| C | -2.31452200 | 5.64763100  | -4.26686900 |
| C | 0.10312800  | 4.60576400  | -3.27163500 |
| C | 1.32386900  | 4.23863300  | -2.77731200 |
| C | 1.57427600  | 4.23919300  | -1.37461700 |
| C | 2.85878000  | 3.99943800  | -0.87342500 |
| C | -0.93090400 | 5.03700100  | -2.38599100 |
| C | -0.77199400 | 5.00821800  | -1.00945700 |
| C | 0.48746600  | 4.55901800  | -0.47917600 |
| C | 0.74592200  | 4.48099000  | 0.89454000  |
| C | -1.82073800 | 5.62751200  | -0.09523500 |
| H | -0.68783500 | 6.93821600  | 4.12779100  |
| H | -2.35935600 | 6.44301400  | 4.51049500  |
| H | -1.02774000 | 5.24865500  | 4.58974400  |
| H | -3.04981900 | 4.27063400  | 4.24023300  |
| H | -4.65002500 | 2.59390900  | 3.43861700  |
| H | -5.83303300 | 1.54936700  | 1.61579200  |

|   |             |             |             |
|---|-------------|-------------|-------------|
| H | -3.20406800 | 4.12005600  | -1.70387400 |
| H | -4.25670700 | 2.94690100  | -3.52353300 |
| H | -5.90092700 | 1.31375400  | -4.32882900 |
| H | -8.38815900 | -1.24202900 | -4.21453000 |
| H | -8.01240800 | 0.45451200  | -4.61986700 |
| H | -6.71993200 | -0.78414900 | -4.65188700 |
| H | -7.83836700 | -0.65628300 | -0.57994600 |
| H | -7.83846600 | 0.65531700  | 0.57990500  |
| H | -8.38838500 | 1.24112400  | 4.21442400  |
| H | -8.01239900 | -0.45534900 | 4.61982700  |
| H | -6.72010000 | 0.78349600  | 4.65182300  |
| H | -5.90078200 | -1.31430800 | 4.32885000  |
| H | -4.25631600 | -2.94724000 | 3.52363000  |
| H | -5.83284400 | -1.55017700 | -1.61575800 |
| H | -3.20352100 | -4.12034300 | 1.70402900  |
| H | -4.64967900 | -2.59461800 | -3.43853500 |
| H | -3.04924900 | -4.27116600 | -4.24007900 |
| H | -0.68701000 | -6.93850800 | -4.12751800 |
| H | -2.35857100 | -6.44346200 | -4.51023700 |
| H | -1.02705500 | -5.24899500 | -4.58954800 |
| H | -1.32959900 | -6.41185400 | -0.48628600 |
| H | -2.56160700 | -6.12399300 | 0.72674500  |
| H | -3.30582000 | -6.08464000 | 4.38852400  |
| H | -1.56540400 | -6.31509400 | 4.71024300  |
| H | -2.28189600 | -4.67573300 | 4.77700900  |
| H | -0.06228900 | -4.60960600 | 4.34191600  |
| H | 2.13010500  | -3.96268600 | 3.45298000  |
| H | -0.03090000 | -4.71527400 | -1.60691500 |
| H | 3.65869500  | -3.85515100 | 1.58525800  |
| H | 1.41981100  | -4.26421300 | -3.48022300 |
| H | 3.68544700  | -3.93631000 | -4.36118400 |
| H | 7.23309900  | -3.61052000 | -4.37949400 |
| H | 5.82447500  | -4.64385600 | -4.74206100 |
| H | 5.65722800  | -2.86070200 | -4.75071600 |
| H | 6.57843800  | -3.88909400 | -0.72986200 |
| H | 5.68128600  | -4.80995300 | 0.46014000  |
| H | 5.72792400  | -5.68275400 | 4.07948300  |
| H | 6.72809200  | -4.26139400 | 4.48288800  |
| H | 4.94347000  | -4.15457700 | 4.56213900  |
| H | 5.93693500  | -2.12481700 | 4.24963800  |
| H | 5.95574100  | 0.20611400  | 3.48459700  |
| H | 5.95007400  | -1.81770300 | -1.68593400 |
| H | 5.94997700  | 1.81831200  | 1.68579800  |
| H | 5.95534100  | -0.20550700 | -3.48473000 |

|    |             |             |             |
|----|-------------|-------------|-------------|
| H  | 5.93602600  | 2.12542400  | -4.24977500 |
| H  | 5.72644200  | 5.68333500  | -4.07958000 |
| H  | 6.72683000  | 4.26216300  | -4.48309700 |
| H  | 4.94222000  | 4.15501800  | -4.56216800 |
| H  | 5.68058000  | 4.81052300  | -0.46024300 |
| H  | 6.57787000  | 3.88972700  | 0.72970600  |
| H  | 7.23270200  | 3.61115000  | 4.37931700  |
| H  | 5.82399700  | 4.64433700  | 4.74199200  |
| H  | 5.65691700  | 2.86116600  | 4.75057000  |
| H  | 3.68500700  | 3.93664800  | 4.36115900  |
| H  | 1.41930800  | 4.26436200  | 3.48028300  |
| H  | -3.30666600 | 6.08473900  | -4.38826200 |
| H  | -1.56626700 | 6.31526300  | -4.71001100 |
| H  | -2.28270400 | 4.67588100  | -4.77683800 |
| H  | -0.06307100 | 4.60983900  | -4.34180200 |
| H  | 2.12939100  | 3.96303300  | -3.45295000 |
| H  | 3.65805400  | 3.85557200  | -1.58528100 |
| H  | -0.03150500 | 4.71533700  | 1.60703900  |
| H  | -1.33047800 | 6.41173800  | 0.48651900  |
| H  | -2.56247200 | 6.12376300  | -0.72649700 |
| C  | 0.22158500  | 0.68242700  | -1.67156100 |
| C  | 0.20011700  | -0.74854300 | -1.65655200 |
| C  | -1.16652600 | -1.16922800 | -1.65205500 |
| C  | -1.98994500 | 0.00034400  | -1.66166100 |
| C  | -1.13159300 | 1.14466700  | -1.67507400 |
| C  | 0.20039600  | 0.74844500  | 1.65623700  |
| C  | -1.16624900 | 1.16913000  | 1.65198900  |
| C  | 0.22186800  | -0.68252400 | 1.67115600  |
| C  | -1.98966700 | -0.00044200 | 1.66166100  |
| C  | -1.13131200 | -1.14476400 | 1.67485200  |
| Co | -0.77098300 | -0.00000600 | -0.00010000 |
| H  | 1.09821200  | 1.31474700  | -1.62175300 |
| H  | 1.05761600  | -1.40638700 | -1.59767400 |
| H  | -1.51315800 | -2.19071400 | -1.58093200 |
| H  | -3.06983600 | 0.01543200  | -1.60116300 |
| H  | -1.44713300 | 2.17748800  | -1.61744800 |
| H  | 1.05788100  | 1.40629900  | 1.59727500  |
| H  | -1.51289300 | 2.19062100  | 1.58102000  |
| H  | 1.09847500  | -1.31485500 | 1.62114700  |
| H  | -3.06956600 | -0.01552800 | 1.60131000  |
| H  | -1.44687200 | -2.17757600 | 1.61719100  |

The atomic coordinates of [Fe<sup>+</sup>@P5]-II:

|   |            |             |            |
|---|------------|-------------|------------|
| O | 3.55297297 | -5.65690654 | 2.74861690 |
| O | 6.65070480 | 1.67025736  | 2.81925687 |



|   |             |             |             |
|---|-------------|-------------|-------------|
| O | 0.45252443  | 6.66315766  | 2.76483734  |
| O | -6.40672869 | 2.62375003  | 2.71330937  |
| O | 6.55901590  | 2.22443197  | -2.70887192 |
| O | -0.03430833 | 6.67553972  | -2.75840441 |
| O | -6.51274877 | 2.06025085  | -2.81453148 |
| O | 4.00340853  | -5.29219895 | -2.77545001 |
| O | -3.90863810 | -5.44070043 | -2.73227682 |
| O | -4.34064503 | -5.04830703 | 2.79104972  |
| C | -4.06015751 | -5.76714956 | -4.09850115 |
| C | -4.29820092 | -4.20398229 | -2.30018001 |
| C | -4.61147041 | -3.16249337 | -3.22814108 |
| C | -4.97629223 | -1.93001088 | -2.77725632 |
| C | -4.33551065 | -3.99505001 | -0.93807097 |
| C | -5.05063076 | -1.65409773 | -1.38104490 |
| C | -4.73292249 | -2.70265920 | -0.45406110 |
| C | -5.43282738 | -0.39122444 | -0.92387962 |
| C | -4.83448961 | -2.41268106 | 0.90952262  |
| C | -5.49855369 | -0.08971843 | 0.43982756  |
| C | -5.19144648 | -1.14215387 | 1.36677833  |
| C | -5.90823181 | 1.19972545  | 0.92142305  |
| C | -5.28934049 | -0.87196959 | 2.76268079  |
| C | -5.68297582 | 0.35211868  | 3.21072935  |
| C | -6.00800580 | 1.38952890  | 2.28263815  |
| C | -6.62331654 | 2.83113041  | 4.09274437  |
| C | -6.31367101 | 2.29641300  | -0.04656220 |
| C | -6.82788154 | 2.13449742  | -4.18923887 |
| C | -5.39593013 | 2.70296011  | -2.35712602 |
| C | -5.23820581 | 2.80075041  | -0.99206917 |
| C | -4.41908371 | 3.21754661  | -3.26528853 |
| C | -3.31336344 | 3.85793538  | -2.79459669 |
| C | -3.10873542 | 4.02728592  | -1.39352832 |
| C | -4.07912740 | 3.48232345  | -0.48574691 |
| C | -3.86784368 | 3.68338645  | 0.88236772  |
| C | -2.01233712 | 4.74906600  | -0.91495884 |
| C | -1.80405646 | 4.95526548  | 0.45253289  |
| C | -2.76012575 | 4.38655545  | 1.36192087  |
| C | -2.57384800 | 4.58814352  | 2.76136383  |
| C | -1.52588947 | 5.32150288  | 3.22711688  |
| C | -0.59990364 | 5.91692180  | 2.31469015  |
| C | -0.71358243 | 5.74642237  | 0.95217601  |
| C | 0.50247910  | 7.02759510  | 4.12818504  |
| C | 0.20391895  | 6.49647720  | 0.00330738  |
| C | -0.06055407 | 7.04157999  | -4.12190219 |
| C | 0.97473531  | 5.87158438  | -2.30734186 |

|   |             |             |             |
|---|-------------|-------------|-------------|
| C | 1.86506036  | 5.22417354  | -3.21961914 |
| C | 1.07983592  | 5.69673147  | -0.94468897 |
| C | 2.87022636  | 4.43316802  | -2.75359717 |
| C | 3.04495478  | 4.22225546  | -1.35404185 |
| C | 2.12433703  | 4.84617674  | -0.44442025 |
| C | 2.32394755  | 4.63317442  | 0.92321200  |
| C | 4.10975182  | 3.45540384  | -0.87490260 |
| C | 4.30925831  | 3.24242714  | 0.49310221  |
| C | 3.37652824  | 3.84864510  | 1.40158470  |
| C | 3.57541117  | 3.67287347  | 2.80262144  |
| C | 4.63980602  | 2.96593963  | 3.27297341  |
| C | 5.57778284  | 2.38497186  | 2.36395617  |
| C | 5.42260707  | 2.48860310  | 0.99908356  |
| C | 6.96456554  | 1.70943436  | 4.19548466  |
| C | 6.45664502  | 1.90458392  | 0.05288591  |
| C | 6.84808918  | 2.39118227  | -4.08087840 |
| C | 6.07647239  | 1.02171351  | -2.27505492 |
| C | 5.67190855  | 0.01119314  | -3.20156427 |
| C | 5.19744711  | -1.18299209 | -2.75187681 |
| C | 5.47262448  | -0.41817581 | -0.42970531 |
| C | 5.09152454  | -1.44722685 | -1.35522555 |
| C | 5.96895839  | 0.83992081  | -0.91342666 |
| C | 5.39116060  | -0.71464374 | 0.93434659  |
| C | 4.65633361  | -2.69271685 | -0.89683572 |
| C | 4.54264660  | -2.97684463 | 0.46706296  |
| C | 4.92858386  | -1.95019829 | 1.39287053  |
| C | 4.84182082  | -2.22150302 | 2.78936789  |
| C | 4.40129338  | -3.42827624 | 3.24132220  |
| C | 4.01889204  | -4.44754605 | 2.31470675  |
| C | 4.06623953  | -4.24196416 | 0.95238086  |
| C | 3.68372876  | -5.99025090 | 4.11525885  |
| C | 3.70195064  | -5.35580754 | -0.01140018 |
| C | 4.21978555  | -5.55907018 | -4.14641130 |
| C | 2.72459674  | -5.14175085 | -2.32223961 |
| C | 1.63210411  | -5.00519539 | -3.23427668 |
| C | 0.35675109  | -4.89755772 | -2.76846325 |
| C | 2.53821549  | -5.10743008 | -0.95634865 |
| C | 0.08913370  | -4.89628095 | -1.36757846 |
| C | 1.19711154  | -4.96638487 | -0.45533769 |
| C | -4.57581761 | -5.26769143 | 4.16714243  |
| C | -1.95623482 | -4.90351785 | 3.25189031  |
| C | -0.67681125 | -4.87253088 | 2.78634556  |
| C | -0.40901112 | -4.88496879 | 1.38554695  |
| C | 0.90437725  | -4.94743719 | 0.91259664  |

|   |             |             |             |
|---|-------------|-------------|-------------|
| C | -3.05480766 | -4.97298266 | 2.33950682  |
| C | -2.86622560 | -4.94904636 | 0.97366295  |
| C | -1.51916273 | -4.88639449 | 0.47301782  |
| C | -1.22557064 | -4.88026071 | -0.89474154 |
| C | -4.04222935 | -5.12759288 | 0.02808659  |
| H | -3.80161178 | -6.82251241 | -4.18242391 |
| H | -5.09318053 | -5.61744743 | -4.43169711 |
| H | -3.38517421 | -5.18008187 | -4.73295629 |
| H | -4.56550853 | -3.35413945 | -4.29347006 |
| H | -5.22254590 | -1.13683596 | -3.47872557 |
| H | -5.72434161 | 0.34714620  | -1.66123451 |
| H | -4.67202043 | -3.18944289 | 1.64748464  |
| H | -5.05741939 | -1.66803124 | 3.46570243  |
| H | -5.76122828 | 0.53413015  | 4.27583908  |
| H | -6.99582557 | 3.85107924  | 4.18540173  |
| H | -7.37009851 | 2.13473867  | 4.49001394  |
| H | -5.69337029 | 2.73307554  | 4.66633198  |
| H | -6.68513386 | 3.14448900  | 0.53530805  |
| H | -7.15380573 | 1.93558594  | -0.64665866 |
| H | -7.80910571 | 1.67238424  | -4.29599171 |
| H | -6.87594375 | 3.17431195  | -4.53113252 |
| H | -6.10362263 | 1.58372707  | -4.80181969 |
| H | -4.56468829 | 3.11066554  | -4.33375330 |
| H | -2.57903156 | 4.26799099  | -3.48294446 |
| H | -4.59375799 | 3.32895455  | 1.60449665  |
| H | -1.34164949 | 5.19455305  | -1.64020209 |
| H | -3.29486032 | 4.15719822  | 3.45113670  |
| H | -1.40497966 | 5.46934342  | 4.29365217  |
| H | 1.35851484  | 7.69509796  | 4.22575036  |
| H | -0.40728134 | 7.55618089  | 4.43435093  |
| H | 0.65198561  | 6.15518322  | 4.77594481  |
| H | 0.85864700  | 7.13316781  | 0.60501135  |
| H | -0.41692706 | 7.16495793  | -0.60000149 |
| H | -0.87200629 | 7.76232252  | -4.22115624 |
| H | 0.88134178  | 7.51058068  | -4.42801760 |
| H | -0.26466158 | 6.17972419  | -4.76883552 |
| H | 1.75183549  | 5.37739310  | -4.28622607 |
| H | 3.56577878  | 3.96148458  | -3.44295823 |
| H | 1.68415360  | 5.12187776  | 1.64877343  |
| H | 4.81430607  | 3.06080169  | -1.59718565 |
| H | 2.86959885  | 4.12985738  | 3.49133887  |
| H | 4.78149228  | 2.85448209  | 4.34146808  |
| H | 7.91034922  | 1.17807730  | 4.30046180  |
| H | 7.08548529  | 2.73977395  | 4.54821990  |

|    |             |             |             |
|----|-------------|-------------|-------------|
| H  | 6.20054668  | 1.20571904  | 4.80017188  |
| H  | 7.26711374  | 1.48071358  | 0.65244840  |
| H  | 6.89159046  | 2.72098144  | -0.53035843 |
| H  | 7.30894727  | 3.37465201  | -4.17084237 |
| H  | 7.54862265  | 1.62766891  | -4.43716502 |
| H  | 5.93821240  | 2.36372016  | -4.69268588 |
| H  | 5.75392304  | 0.19002163  | -4.26700645 |
| H  | 4.90460218  | -1.96031834 | -3.45321755 |
| H  | 5.73281289  | 0.00311370  | 1.67051438  |
| H  | 4.44169656  | -3.45670704 | -1.63480301 |
| H  | 5.14207128  | -1.44644288 | 3.49004914  |
| H  | 4.34758623  | -3.61701759 | 4.30680679  |
| H  | 3.35681134  | -7.02636905 | 4.20086493  |
| H  | 4.72450033  | -5.90836453 | 4.44774829  |
| H  | 3.04884033  | -5.35971578 | 4.74917961  |
| H  | 3.47466473  | -6.25046439 | 0.57495047  |
| H  | 4.58257968  | -5.59112155 | -0.61535382 |
| H  | 5.28603716  | -5.76152155 | -4.24464868 |
| H  | 3.65042667  | -6.43526256 | -4.47544318 |
| H  | 3.95920638  | -4.69783759 | -4.77290707 |
| H  | 1.81507642  | -5.01447658 | -4.30208646 |
| H  | -0.47894213 | -4.83068584 | -3.46037435 |
| H  | -5.65281616 | -5.40093848 | 4.26643659  |
| H  | -4.06351258 | -6.16956478 | 4.52005698  |
| H  | -4.26286381 | -4.40918401 | 4.77324828  |
| H  | -2.13961804 | -4.90234088 | 4.31962217  |
| H  | 0.16141467  | -4.85654439 | 3.47810653  |
| H  | 1.70081849  | -5.04000642 | 1.64212831  |
| H  | -2.02584013 | -4.92395158 | -1.62438375 |
| H  | -3.87069472 | -6.03656391 | -0.55544947 |
| H  | -4.93655892 | -5.30618257 | 0.63157262  |
| C  | -1.93689965 | 0.16146994  | -0.88415618 |
| C  | -1.91323793 | -1.21713337 | -0.52071536 |
| C  | -1.69456180 | -1.29684975 | 0.88405215  |
| C  | -1.57258720 | 0.03353924  | 1.38279911  |
| C  | -1.72464583 | 0.93654844  | 0.29121865  |
| C  | 1.57946563  | -0.09082041 | -1.45043037 |
| C  | 1.81815868  | 0.76491537  | -0.33630386 |
| C  | 1.56302216  | -1.43850293 | -0.98444196 |
| C  | 1.94464621  | -0.05694140 | 0.81968768  |
| C  | 1.78317681  | -1.41605605 | 0.42207846  |
| Fe | -0.01424008 | -0.33770571 | -0.03962361 |
| H  | -2.07088152 | 0.55943453  | -1.88167228 |
| H  | -2.01627332 | -2.06449005 | -1.18815184 |

|   |             |             |             |
|---|-------------|-------------|-------------|
| H | -1.60628707 | -2.21386537 | 1.45553275  |
| H | -1.36918516 | 0.31179355  | 2.40801077  |
| H | -1.65173647 | 2.01717044  | 0.33660962  |
| H | 1.41106446  | 0.23280105  | -2.46864029 |
| H | 1.86018993  | 1.84798350  | -0.35568798 |
| H | 1.38023284  | -2.32649644 | -1.57875336 |
| H | 2.11122058  | 0.29871078  | 1.82806799  |
| H | 1.79193658  | -2.28590863 | 1.06805614  |

The atomic coordinates of [**Cob**<sup>+</sup>@**P5**]-II:

|   |             |             |             |
|---|-------------|-------------|-------------|
| O | 0.23594500  | 6.62901100  | 2.76103200  |
| O | -6.54708400 | 2.46646500  | 2.65811800  |
| O | -4.15635000 | -5.10947200 | 2.83075400  |
| O | 3.74116700  | -5.58549800 | 2.68436900  |
| O | -6.58436500 | 1.81733800  | -2.86028400 |
| O | -3.73562100 | -5.58912700 | -2.68395600 |
| O | 4.16136400  | -5.10603400 | -2.83043300 |
| O | -0.24224500 | 6.62952700  | -2.76036600 |
| O | 6.54420500  | 2.47246300  | -2.65860400 |
| O | 6.58298200  | 1.82373300  | 2.85980900  |
| C | 6.67826300  | 2.74258900  | -4.04431500 |
| C | 6.09287800  | 1.24231700  | -2.25082500 |
| C | 5.71287000  | 0.23889500  | -3.19080300 |
| C | 5.25933900  | -0.97645700 | -2.75731400 |
| C | 5.99322200  | 1.03424900  | -0.88556800 |
| C | 5.15692500  | -1.26421100 | -1.36702700 |
| C | 5.52382000  | -0.23847000 | -0.42060900 |
| C | 4.74124600  | -2.52387100 | -0.92209400 |
| C | 5.43531600  | -0.55510500 | 0.94094800  |
| C | 4.63531000  | -2.83378500 | 0.43997700  |
| C | 4.99177400  | -1.80448100 | 1.38618500  |
| C | 4.20856000  | -4.12034100 | 0.90894400  |
| C | 4.89993100  | -2.09305600 | 2.77697800  |
| C | 4.49377200  | -3.32384800 | 3.21436800  |
| C | 4.16005300  | -4.34448700 | 2.27507100  |
| C | 3.73396800  | -5.89944700 | 4.06778200  |
| C | 3.88343300  | -5.23711900 | -0.06807700 |
| C | 4.40711000  | -5.11934600 | -4.22785700 |
| C | 2.87357100  | -5.01255400 | -2.36992300 |
| C | 2.69720700  | -5.02172700 | -0.99563000 |
| C | 1.77017600  | -4.89487900 | -3.26708100 |
| C | 0.49065700  | -4.84587100 | -2.78520500 |
| C | 0.23662800  | -4.88179200 | -1.38445400 |
| C | 1.36057600  | -4.92852000 | -0.47878600 |
| C | 1.07855400  | -4.91336900 | 0.89384500  |

|   |             |             |             |
|---|-------------|-------------|-------------|
| C | -1.07367500 | -4.91415500 | -0.89346800 |
| C | -1.35568800 | -4.92964500 | 0.47915400  |
| C | -0.23177700 | -4.88208300 | 1.38482500  |
| C | -0.48584700 | -4.84641900 | 2.78558500  |
| C | -1.76532800 | -4.89642600 | 3.26745200  |
| C | -2.86862900 | -5.01495800 | 2.37027300  |
| C | -2.69224400 | -5.02403800 | 0.99598900  |
| C | -4.40216200 | -5.12277400 | 4.22816400  |
| C | -3.87825500 | -5.24058900 | 0.06843400  |
| C | -3.72796100 | -5.90317300 | -4.06734300 |
| C | -4.15581700 | -4.34851900 | -2.27480700 |
| C | -4.49074400 | -3.32838000 | -3.21421200 |
| C | -4.20448400 | -4.12423100 | -0.90869900 |
| C | -4.89809900 | -2.09793700 | -2.77694600 |
| C | -4.99003900 | -1.80924400 | -1.38619000 |
| C | -4.63247200 | -2.83805900 | -0.43986800 |
| C | -4.73858400 | -2.52804700 | 0.92217800  |
| C | -5.43476500 | -0.56023700 | -0.94109500 |
| C | -5.52352700 | -0.24351900 | 0.42042300  |
| C | -5.15550200 | -1.26875200 | 1.36696200  |
| C | -5.25817100 | -0.98092500 | 2.75721900  |
| C | -5.71307100 | 0.23396300  | 3.19055800  |
| C | -6.09428500 | 1.23682300  | 2.25046400  |
| C | -5.99431500 | 1.02873600  | 0.88523100  |
| C | -6.68159400 | 2.73651600  | 4.04379900  |
| C | -6.43046300 | 2.10346500  | -0.09703200 |
| C | -6.78770400 | 1.67348700  | -4.25638300 |
| C | -5.47916500 | 2.49160100  | -2.40389800 |
| C | -4.49136700 | 2.99514400  | -3.30161600 |
| C | -3.40199800 | 3.66893500  | -2.82130200 |
| C | -4.21417000 | 3.33348100  | -0.51718500 |
| C | -3.23087200 | 3.87776700  | -1.42321400 |
| C | -5.35294900 | 2.62879400  | -1.03191000 |
| C | -4.01785400 | 3.55013500  | 0.85331900  |
| C | -2.15591500 | 4.63016100  | -0.93565600 |
| C | -1.96917000 | 4.86141200  | 0.43386900  |
| C | -2.92358600 | 4.27155100  | 1.34335500  |
| C | -2.74606600 | 4.47134800  | 2.74221700  |
| C | -1.71060400 | 5.22768200  | 3.21711800  |
| C | -0.80051200 | 5.85078100  | 2.31162900  |
| C | -0.90819100 | 5.68389900  | 0.94097600  |
| C | 0.34540500  | 6.91692200  | 4.14546300  |
| C | -0.00313100 | 6.46170100  | 0.00028200  |
| C | -0.35263400 | 6.91667700  | -4.14487900 |

|   |             |             |             |
|---|-------------|-------------|-------------|
| C | 0.79464000  | 5.85175600  | -2.31117800 |
| C | 1.70499800  | 5.22928000  | -3.21682500 |
| C | 2.74099300  | 4.47357200  | -2.74209500 |
| C | 0.90250700  | 5.68472100  | -0.94055000 |
| C | 2.91886100  | 4.27387200  | -1.34326300 |
| C | 1.96407400  | 4.86291500  | -0.43361200 |
| C | 6.78662700  | 1.68001600  | 4.25587300  |
| C | 4.48882100  | 2.99932100  | 3.30145900  |
| C | 3.39858700  | 3.67183300  | 2.82130700  |
| C | 3.22692600  | 3.88033500  | 1.42323600  |
| C | 2.15118200  | 4.63172000  | 0.93586700  |
| C | 5.47696400  | 2.49674800  | 2.40359200  |
| C | 5.35032100  | 2.63371000  | 1.03160800  |
| C | 4.21065300  | 3.33703000  | 0.51705400  |
| C | 4.01389400  | 3.55348900  | -0.85342200 |
| C | 6.42826800  | 2.10953700  | 0.09657300  |
| H | 7.06223400  | 3.76160600  | -4.10979300 |
| H | 7.38761100  | 2.05663300  | -4.52318900 |
| H | 5.71237500  | 2.68636000  | -4.56375600 |
| H | 5.79257900  | 0.43399700  | -4.25326100 |
| H | 4.98325700  | -1.74670000 | -3.47284500 |
| H | 4.54448800  | -3.28073000 | -1.66800600 |
| H | 5.76133700  | 0.15592400  | 1.68599900  |
| H | 5.16706700  | -1.31754500 | 3.49017000  |
| H | 4.43647200  | -3.52516100 | 4.27707400  |
| H | 3.41074300  | -6.93942400 | 4.13180100  |
| H | 4.73330300  | -5.80218200 | 4.50887000  |
| H | 3.02879400  | -5.26811700 | 4.62459800  |
| H | 3.70520800  | -6.14914700 | 0.50706400  |
| H | 4.76461900  | -5.42544600 | -0.68626200 |
| H | 5.48811800  | -5.21854700 | -4.33491200 |
| H | 3.91496200  | -5.96897800 | -4.71625400 |
| H | 4.08074100  | -4.18575400 | -4.70464600 |
| H | 1.94175500  | -4.87367300 | -4.33625700 |
| H | -0.35224600 | -4.79490000 | -3.46953100 |
| H | 1.88149200  | -4.98095800 | 1.61326000  |
| H | -1.87656400 | -4.98226200 | -1.61288100 |
| H | 0.35701700  | -4.79485500 | 3.46991500  |
| H | -1.93694800 | -4.87538400 | 4.33662300  |
| H | -5.48311100 | -5.22268000 | 4.33517100  |
| H | -3.90948300 | -5.97202300 | 4.71669600  |
| H | -4.07644600 | -4.18891100 | 4.70486800  |
| H | -4.75928000 | -5.42968800 | 0.68661600  |
| H | -3.69915000 | -6.15250200 | -0.50661700 |

|   |             |             |             |
|---|-------------|-------------|-------------|
| H | -3.40342700 | -6.94274700 | -4.13126400 |
| H | -4.72739700 | -5.80719900 | -4.50848600 |
| H | -3.02355900 | -5.27098800 | -4.62416700 |
| H | -4.43345900 | -3.52980900 | -4.27689600 |
| H | -5.16617800 | -1.32282500 | -3.49021900 |
| H | -4.54105900 | -3.28462400 | 1.66817700  |
| H | -5.76160900 | 0.15032500  | -1.68623700 |
| H | -4.98115000 | -1.75074100 | 3.47284700  |
| H | -5.79294600 | 0.42912700  | 4.25299300  |
| H | -7.06691700 | 3.75503000  | 4.10917700  |
| H | -7.39006400 | 2.04965500  | 4.52267200  |
| H | -5.71566500 | 2.68160000  | 4.56330300  |
| H | -6.83880500 | 2.94147000  | 0.47305200  |
| H | -7.24944600 | 1.71195400  | -0.70556100 |
| H | -7.73371800 | 1.14065200  | -4.36270200 |
| H | -6.86146500 | 2.64691700  | -4.75620900 |
| H | -5.98761300 | 1.08484600  | -4.72484600 |
| H | -4.60987700 | 2.85945100  | -4.36969800 |
| H | -2.66021400 | 4.07303600  | -3.50521400 |
| H | -4.74605800 | 3.19673900  | 1.56881500  |
| H | -1.48770800 | 5.07854300  | -1.65664300 |
| H | -3.45842900 | 4.02171500  | 3.42900200  |
| H | -1.59604500 | 5.37134400  | 4.28460200  |
| H | 1.20380000  | 7.58357000  | 4.24020200  |
| H | -0.55075900 | 7.42293200  | 4.52479200  |
| H | 0.52769700  | 6.00987600  | 4.73683300  |
| H | 0.62756100  | 7.11513900  | 0.60858400  |
| H | -0.63432500 | 7.11474900  | -0.60791100 |
| H | -1.21161000 | 7.58259300  | -4.23949900 |
| H | 0.54292700  | 7.42323100  | -4.52491000 |
| H | -0.53449900 | 6.00920000  | -4.73571800 |
| H | 1.59020800  | 5.37292300  | -4.28428600 |
| H | 3.45352100  | 4.02436700  | -3.42899100 |
| H | 7.73312000  | 1.14800400  | 4.36205700  |
| H | 6.85959800  | 2.65349600  | 4.75571800  |
| H | 5.98710900  | 1.09066500  | 4.72441900  |
| H | 4.60777000  | 2.86398600  | 4.36953800  |
| H | 2.65654000  | 4.07524200  | 3.50534200  |
| H | 1.48267600  | 5.07944700  | 1.65698500  |
| H | 4.74234500  | 3.20084600  | -1.56904200 |
| H | 6.83557000  | 2.94798400  | -0.47360600 |
| H | 7.24778000  | 1.71897400  | 0.70499800  |
| C | -1.66644800 | 0.90609400  | 0.33717400  |
| C | -1.87120900 | 0.10341900  | -0.82472300 |



|    |             |             |             |
|----|-------------|-------------|-------------|
| C  | -1.77822100 | -1.26971800 | -0.44329900 |
| C  | -1.52369500 | -1.32060100 | 0.95922800  |
| C  | -1.44845000 | 0.02346700  | 1.43924200  |
| C  | 1.66548100  | 0.90807500  | -0.33872600 |
| C  | 1.87089200  | 0.10673700  | 0.82397300  |
| C  | 1.44911400  | 0.02413000  | -1.44003700 |
| C  | 1.77986200  | -1.26691200 | 0.44379700  |
| C  | 1.52601300  | -1.31940100 | -0.95877300 |
| Co | 0.00029600  | -0.29753600 | -0.00040900 |
| H  | -1.64219300 | 1.98645700  | 0.36653700  |
| H  | -2.04395600 | 0.48000500  | -1.82313200 |
| H  | -1.85394600 | -2.12851900 | -1.09393900 |
| H  | -1.37196300 | -2.22207200 | 1.53581200  |
| H  | -1.23194300 | 0.32451100  | 2.45468400  |
| H  | 1.64019800  | 1.98837400  | -0.36926700 |
| H  | 2.04265800  | 0.48455200  | 1.82209100  |
| H  | 1.23263900  | 0.32372000  | -2.45591700 |
| H  | 1.85674600  | -2.12493200 | 1.09533600  |
| H  | 1.37562300  | -2.22150400 | -1.53470000 |

### 13. References

- (1) X.-N. Han, Q.-S. Zong, Y. Han and C.-F. Chen, *CCS Chem.*, 2022, **4**, 318–330.
- (2) X.-N. Han, Y. Han and C.-F. Chen, *J. Am. Chem. Soc.*, 2020, **142**, 8262–8269.
- (3) W. Xia, X.-Y. Hu, Y. Chen, C. Lin and L.-Y. Wang, *Chem. Commun.*, 2013, **49**, 5085-5087.
- (4) D.-S. Guo, V. D. Uzunova, X. Su, Y. Liu and W. M. Nau, *Chem. Sci.*, 2011, **2**, 1722–1734.
